# Supplementary material for: Lifestyle choices of Brazilian college students
Source: PeerJ. 2020 Oct 7;8:e9830. doi: 10.7717/peerj.9830 (PMC7547619; doi:10.7717/peerj.9830)
Supplement: Supplemental Information 2 — Raw data related to students’ characteristics and answers of PEVI [file peerj-08-9830-s002.xlsx]

## Sheet: Codes
Variable (in columns)	Code
ID (identification number)	-
Age (in years old)	-
Sex	0 = male
	1 = female
Course Area	1= Humanities and Social Scientes
	2 = Exact Sciences
	3 = Life and Health Sciences
CAreadic (Course Area dic)	0 = Humanities/Social and Exact Sciences
	1 = health sciences
Course Year	1 = First
	2 = Second
	3 = Third
	4 = Fourth
	5 = Fifth
School/Class Schedule	1 = Morning
	2 = Evening/Afternoon
	3 = Night
	4 = Full-time
Weight (in Kg) and Height (in meters)	-
BMI (Body Mass Index)	-
Weight Status	1 = underweight
	2 = Normal range
	3 = Preobese
	4 = Obese
WSdic (Weight Status dic)	0 = Underweight and Normal Range
	1 = Preobese and Obese
Economic Stratum	1= D-E class
	2 = C class
	3 = B class
	4 = A class
Economic Stratum dic	0 = C, D-E classes
	1 = A, B classes
PEVI items	0= absolutely not part of your lifestyle
	1= sometimes is compatible with your behavior
	2= almost always true in your behavior
	3=the statement is always true in your day-to-day life/is part of your lifestyle
Sample	0 = test sample
	1= validation sample

## Sheet: Database
ID	Age	Sex	Course Area	CAreadic	Course Year	School/Class Schedule	BMI (Body Mass Index)	Weight Status	WSdic	Economic Stratum	Economic Stratum dic	PEVI1	PEVI2	PEVI3	PEVI4	PEVI5	PEVI6	PEVI7	PEVI8	PEVI9	PEVI10	PEVI11	PEVI12	PEVI13	PEVI14	PEVI15	Sample
1	22	1	1	0	4	2	21.2953	2	0	3	1	3	3	3	3	3	0	2	3	2	2	3	0	3	0	3	1
2	21	1	1	0	4	2	23.1247	2	0	3	1	2	1	2	0	0	1	2	1	3	2	3	1	3	1	1	1
3	21	1	1	0	4	2	22.0386	2	0	3	1	3	2	2	1	1	1	2	2	3	3	3	2	3	2	2	0
4	21	1	1	0	4	2	23.5078	2	0	4	1	3	1	1	3	3	1	3	3	1	3	1	1	2	0	0	1
5	22	1	1	0	4	2	26.1286	3	1	4	1	1	2	2	1	2	0	2	2	3	2	3	1	3	1	2	1
6	22	1	1	0	4	2	25.8166	3	1	3	1	2	0	1	3	2	2	3	1	3	3	3	3	3	3	3	0
7	23	1	1	0	4	2	20.3125	2	0	3	1	0	1	2	0	0	1	0	0	3	3	3	3	3	2	1	1
10	21	1	1	0	4	2	23.6652	2	0	3	1	0	1	1	0	0	0	1	3	3	3	1	1	2	2	1	1
11	22	1	1	0	4	2	21.3382	2	0	3	1	1	1	1	3	3	3	3	3	3	1	1	3	3	1	1	1
12	20	1	1	0	4	2	21.551	2	0	3	1	1	1	1	1	1	1	2	3	3	3	1	0	0	2	1	1
13	21	1	1	0	4	2	24.1588	2	0	2	0	2	0	1	2	2	2	3	1	3	3	1	1	0	3	1	1
14	23	0	1	0	4	2	36.6257	4	1	3	1	0	0	1	0	0	0	1	0	3	3	3	3	3	1	3	1
16	22	1	1	0	4	2	26.3656	3	1	3	1	1	0	0	1	0	1	0	3	3	2	2	1	3	2	1	0
17	21	1	1	0	4	2	23.2335	2	0	4	1	1	1	2	0	0	0	1	1	3	2	2	1	0	2	2	1
18	21	1	1	0	4	2	27.6235	3	1	2	0	1	1	1	1	1	1	2	0	3	1	2	2	0	2	1	0
19	28	1	1	0	4	2	23.7118	2	0			1	1	0	3	3	0	0	3	3	2	0	0	1	0	0	0
20	22	0	1	0	4	2	37.1823	4	1	4	1	2	1	2	3	3	2	3	0	3	2	2	1	1	1	1	0
21	23	1	1	0	4	2	27.1809	3	1	2	0	1	0	0	0	0	1	0	0	3	1	0	0	0	1	0	1
22	32	1	1	0		2	21.6128	2	0	3	1	1	0	0	0	3	0	2	3	3	1	1	0	1	3	0	0
22	22	1	1	0	3	2	23.7118	2	0	4	1	1	2	0	0	2	3	3	2	3	3	2	2	2	2	2	1
23	23	1	1	0	4	2	18.3655	1	0	3	1	3	1	3	1	0	1	0	3	3	3	2	2	2	0	1	1
24	22	1	1	0	4	2	19.7133	2	0	3	1	1	0	2	1	0	2	1	3	3	3	2	2	1	1	1	0
25	21	1	1	0	4	2	34.3679	4	1	2	0	2	1	1	0	0	2	0	0	0	1	0	0	0	0	0	1
26	21	0	1	0	1	1	24.8591	2	0	3	1	0	1	1	0	0	3	0	1	3	2	1	2	2	2	1	1
27	18	0	1	0	1	1	17.8359	1	0	4	1	0	0	1	0	3	0	1	0	3	3	3	3	3	1	3	0
28	20	1	1	0	1	1	20.1951	2	0	4	1	1	0	2	0	0	0	0	0	3	3	1	2	3	1	2	0
29	19	1	1	0	1	1	20.7967	2	0	3	1	0	3	1	0	0	2	3	3	3	3	3	2	3	3	2	1
30	18	1	1	0	1	1	34.7656	4	1			1	0	0	0	0	0	0	1	1	1	1	1	2	1	1	1
31	20	1	1	0	1	1	23.1405	2	0	3	1	3	1	0	0	0	0	1	3	3	3	1	1	3	3	2	1
32	18	1	1	0	1	1	19.4734	2	0	4	1	1	2	0	1	2	0	1	3	3	3	3	2	3	1	2	0
33	19	1	1	0	1	1	16.3165	1	0	3	1	1	2	0	0	0	0	1	3	3	3	2	2	3	2	1	1
34	22	1	1	0	1	1	20.2395	2	0	3	1	0	1	0	0	2	2	0	3	3	3	3	0	3	0	1	1
35	20	0	1	0	1	1	27.4238	3	1	4	1	1	1	2	2	2	1	1	0	2	3	2	2	3	3	1	1
36	18	1	1	0	1	1	23.9224	2	0	4	1	0	0	1	0	1	1	1	0	3	3	3	3	3	2	2	1
37	21	0	1	0	4	2	30.3233	4	1	3	1	0	2	1	1	1	2	0	0	3	3	2	3	3	2	2	0
38	20	0	3	1	3	1	22.7833	2	0	4	1	0	0	1	0	0	0	0	1	1	3	3	1	0	3	0	0
39	19	1	1	0	1	1	21.7193	2	0	4	1	1	0	1	0	3	0	0	3	3	3	3	3	3	2	2	0
40	22	1	3	1			19.7222	2	0	3	1	1	3	3	0	0	3	0	0	3	3	3	3	3	1	0	1
41	20	0	3	1	3	3	23.1241	2	0	2	0	2	2	0	2	2	3	1	3	3	3	2	0	3	3	0	1
42	22	1	3	1	5	4	25.3444	3	1	3	1	1	1	2	3	2	0	1	3	1	3	2	1	0	3	3	0
43	20	1	3	1	3		21.0772	2	0	3	1	0	0	0	0	0	0	1	3	3	1	0	0	3	1	1	1
44	21	1	3	1		3	20.6892	2	0	3	1	1	2	3	3	3	1	3	3	3	3	3	2	3	2	2	0
45	21	1	3	1	3	3	30.7364	4	1	3	1	0	1	3	0	0	0	2	3	3	3	2	1	3	2	2	1
46	21	1	3	1	3	3	19.2277	2	0	3	1	0	0	0	0	0	3	1	3	3	2	1	1	2	0	1	0
47	19	0	1	0	1	1	21.6713	2	0	3	1	1	0	3	3	1	3	1	2	3	3	3	3	3	2	1	0
48	21	1	1	0	1	1	20.9572	2	0	4	1	1	1	0	0	2	0	3	3	3	3	3	2	1	2	1	0
49	19	1	1	0	1	1	17.9592	1	0	3	1	2	1	3	2	3	3	2	3	3	3	3	2	3	2	3	1
50	19	0	1	0	1	1	23.0954	2	0	4	1	2	1	2	2	2	3	0	0	2	2	2	1	3	2	1	0
51	19	0	1	0	1	1	25.6173	3	1	4	1	1	0	3	0	1	0	0	3	3	1	1	3	0	0	1	0
52	18	0	1	0	1	1	20.7612	2	0	3	1	1	0	0	0	0	0	0	0	3	2	1	0	2	2	2	1
53	21	1	1	0	1	4	21.0772	2	0	3	1	1	1	0	0	0	0	2	1	2	3	2	3	2	2	2	0
54	23	1	1	0	1	1	23.6832	2	0	3	1	0	1	0	0	0	3	0	3	3	2	2	2	1	0	0	0
55	19	1	1	0	1	1	19.7777	2	0	2	0	0	1	1	0	0	1	1	3	3	2	0	3	3	2	1	1
57	18	0	1	0	1	1	21.7335	2	0	3	1	0	0	1	0	0	3	0	3	3	2	1	2	3	1	2	0
58	18	0	1	0	1	1	22.6627	2	0	3	1	1	1	1	0	1	2	1	3	3	2	2	2	2	2	1	0
60	18	0	1	0	1	1	23.3011	2	0	3	1	0	1	1	1	0	3	1	1	3	1	1	1	2	2	1	1
61	18	0	1	0	1	1	26.8745	3	1	2	0	0	0	1	1	2	0	0	2	2	2	1	1	3	3	3	1
62	22	0	1	0	1	1	23.8088	2	0	4	1	0	1	2	0	0	0	1	1	2	1	0	0	1	1	1	0
63	18	0	1	0	1	1	24.5779	2	0	3	1	0	1	0	1	0	1	1	3	2	3	2	1	2	2	2	1
64	20	1	1	0	2	3	20.202	2	0	4	1	0	0	0	0	0	0	0	0	3	2	2	1	1	2	1	1
65	21	1	1	0	2	3	22.6562	2	0	4	1	1	1	2	0	0	0	0	1	3	3	2	2	1	3	1	1
66	24	0	1	0	2		21.6788	2	0	3	1	3	2	1	3	2	3	2	0	3	3	3	3	3	3	2	0
67	19	0	1	0	1	1	29.2184	3	1	3	1	1	0	2	0	0	0	3	1	3	3	3	3	3	3	3	0
69	20	0	1	0	1	1	22.3958	2	0			1	2	2	0	3	3	3	0	3	3	1	2	2	2	0	0
70	20	0	1	0	2	3	20.1092	2	0	2	0	1	1	1	3	3	1	0	0	3	3	3	3	1	3	3	1
71	20	1	1	0	2	3	21.5645	2	0	4	1	1	2	2	0	0	2	3	1	2	2	2	3	3	2	3	1
72	19	1	1	0	2	3	33.8021	4	1	2	0	1	1	1	0	2	1	1	3	3	3	3	3	0	1	0	1
73	23	1	1	0	2	3	17.0677	1	0	3	1	1	0	1	0	1	0	0	0	3	3	3	3	3	2	2	1
74	19	0	1	0	2	3	22.6757	2	0	2	0	0	1	2	3	3	3	1	3	3	1	1	2	2	1	3	1
75	19	0	1	0	1		22.0581	2	0			0	2	2	0	3	3	0	0	3	3	3	1	3	2	1	1
76	24	0	1	0	2	4	25.3086	3	1	4	1	1	2	2	3	3	3	3	3	3	3	3	3	3	3	3	0
77	24	0	1	0	2	4	22.0384	2	0	3	1	3	3	3	3	3	3	3	3	3	3	3	3	3	3	2	1
78	18	1	1	0	2	3	21.7193	2	0	3	1	1	1	1	3	3	0	0	2	1	3	1	0	1	0	3	1
79	20	1	1	0	2	3	16.2274	1	0	2	0	1	0	1	1	1	1	0	1	0	1	1	0	1	0	0	1
80	21	1	1	0	2	3	28.6851	3	1	3	1	2	1	1	0	1	2	3	3	3	3	3	3	3	2	2	0
81	22	1	2	0	4	4	22.5827	2	0	4	1	0	1	0	3	3	2	2	1	3	1	3	2	1	0	0	0
82	21	0	2	0	4	4	19.1358	2	0	3	1	1	1	3	0	1	2	0	1	3	3	1	2	1	1	2	0
83	22	0	2	0	4	4	26.8745	3	1	3	1	0	0	0	0	0	1	1	2	3	3	1	3	3	3	1	0
84	22	0	2	0	5	4	20.5151	2	0	4	1	0	0	0	0	0	0	0	0	0	2	1	0	2	1	2	1
85	23	1	2	0	5	4	21.8776	2	0	3	1	1	2	1	0	0	0	0	3	3	2	1	2	3	2	1	1
86	24	0	2	0	5	4	24.5089	2	0	3	1	2	0	2	0	0	1	1	1	3	1	2	3	3	2	1	1
87	25	1	2	0	3	4	21.4692	2	0	3	1	2	1	3	3	3	3	0	3	3	2	2	1	2	1	2	0
88	21	1	2	0	4	4	19.9481	2	0	4	1	1	0	1	0	0	1	2	3	3	2	1	0	3	2	2	0
89	22	1	2	0	4	4	17.0656	1	0	3	1	0	0	0	0	0	3	0	2	1	2	1	0	0	1	0	1
90	23	1	2	0	4	4	22.5069	2	0	4	1	1	1	1	0	0	0	0	3	3	2	1	1	3	1	1	1
91	22	1	2	0	4	4	20.8325	2	0	3	1	0	1	0	0	2	0	2	3	3	2	2	2	2	0	1	0
92	24	0	2	0	4	4	27.6817	3	1	3	1	1	0	1	0	0	0	0	2	1	3	2	2	2	2	0	0
93	20	0	1	0	2	4	18.726	2	0			1	2	0	2	2	3	0	1	3	3	2	1	3	3	3	1
94	19	1	1	0	2	1	18.369	1	0	3	1	2	1	2	2	3	3	0	0	2	2	3	3	3	3	1	0
95	20	0	1	0	2	1	25.2595	3	1	3	1	0	1	1	0	0	2	0	3	2	2	3	2	1	1	2	1
96	19	1	1	0	2	1	17.1468	1	0	4	1	1	1	0	1	3	1	0	3	3	3	3	1	3	2	3	0
97	20	0	1	0	2	1				3	1	0	0	1	0	0	0	0	3	2	1	0	1	2	1	1	0
98	19	0	3	1	1	4	31.9715	4	1	4	1	1	0	1	1	2	3	3	0	3	3	3	3	3	3	3	1
99	21	1	3	1	1	4	22.0386	2	0	4	1	1	0	1	0	0	1	1	2	2	2	3	2	2	0	1	0
100	18	1	3	1	1	4	22.6562	2	0	3	1	2	1	3	0	3	1	2	3	3	3	1	0	3	1	1	0
101	18	1	3	1	1	4	21.1927	2	0	4	1	3	2	3	0	1	3	0	3	3	3	0	3	3	0	3	0
102	20	1	3	1	1	4	21.0198	2	0	3	1	1	1	3	1	0	1	1	2	3	3	3	2	2	2	2	1
103	18	0	3	1	1	4	26.493	3	1	4	1	0	1	2	1	2	0	0	1	3	2	1	2	0	1	2	1
104	20	1	3	1	1	4	24.0569	2	0			1	1	1	2	3	2	1	3	3	3	2	1	3	2	3	0
105	19	1	3	1	1		23.1837	2	0	3	1	1	1	1	0	0	1	3	3	3	1	1	1	0	0	2	0
106	18	1	3	1	1	4	25.0762	3	1	3	1	0	1	0	0	0	1	1	3	3	2	3	2	2	0	1	1
107	18	1	3	1	1	4	32.4219	4	1	3	1	0	0	0	0	0	2	1	0	2	3	2	0	3	3	3	1
108	19	1	3	1	1	4	21.3039	2	0	3	1	0	2	1	1	0	2	2	3	3	2	3	3	0	1	1	1
109	18	0	3	1	1	4	22.4567	2	0	3	1	1	0	1	0	2	2	2	1	2	2	2	2	2	2	1	0
111	18	1	3	1	1	4	19.9219	2	0	4	1	1	1	0	0	0	1	1	3	2	1	2	2	2	1	1	1
112	18	1	3	1	1	4	21.7993	2	0	3	1	0	1	0	1	3	0	0	3	2	1	0	2	1	0	1	0
113	19	1	3	1		4	21.2306	2	0	3	1	1	1	2	1	1	1	2	3	2	2	2	1	1	2	2	0
114	21	1	3	1	1	4	20.8984	2	0	3	1	3	3	3	0	0	1	3	3	3	3	3	3	3	1	1	0
115	18	1	3	1	1	4	19.4674	2	0	3	1	1	1	0	0	0	0	3	3	3	2	1	1	2	2	0	0
116	18	1	3	1	1	4	30.385	4	1	3	1	1	1	1	0	0	0	0	0	3	3	2	2	3	1	1	0
117	21	1	3	1	2	4	19.3452	2	0	3	1	0	2	1	1	1	1	3	3	3	0	0	0	0	3	0	0
118	19	0	3	1	1		28.6927	3	1	4	1	1	1	1	0	1	0	3	1	3	3	1	2	3	2	1	0
119	18	1	3	1	1	4	18.6453	2	0	3	1	1	1	2	0	0	0	1	3	2	3	3	2	3	2	3	0
120	20	1	3	1	1	4	22.3214	2	0	3	1	1	1	0	0	1	2	2	3	3	2	2	2	3	3	2	0
121	19	1	3	1	1	4	20.679	2	0	2	0	1	1	3	1	2	0	0	3	3	2	1	0	0	2	0	1
122	18	1	3	1	1	4	24.677	2	0	3	1	1	3	3	2	1	3	3	3	3	2	3	1	2	1	1	1
123	20	1	3	1	1	4	20.7008	2	0	3	1	1	2	1	0	0	2	2	3	2	1	1	1	1	1	1	1
124	19	1	3	1	1	4	23.4375	2	0	3	1	0	0	0	0	0	1	2	2	3	2	3	2	3	1	1	1
125	18	0	3	1	1	4	22.0386	2	0	3	1	0	1	1	3	3	3	3	2	1	3	1	3	3	1	2	0
126	18	1	3	1	1	4	19.6072	2	0	3	1	2	1	0	0	2	1	0	3	3	2	2	1	3	0	2	0
127	20	1	3	1	1	4	24.8777	2	0	2	0	1	3	1	1	3	0	3	1	3	2	3	3	3	0	1	0
128	21	0	3	1	3	4	24.3375	2	0	3	1	2	3	3	3	3	3	2	3	3	2	1	0	3	1	2	0
129	19	0	3	1	1	4	20.0617	2	0			2	2	1	1	3	3	3	3	3	1	2	2	2	1	1	1
130	21	0	3	1	4	3	21.9713	2	0	3	1	1	2	0	1	0	1	0	0	2	2	2	1	3	1	1	1
131	19	0	3	1	2	4	19.487	2	0	4	1	2	1	3	0	0	3	3	1	3	3	2	3	3	2	1	0
132	20	1	3	1	1	4				2	0	1	1	0	0	0	2	0	2	1	3	3	1	2	1	1	1
133	18	0	3	1	2	4	25.8264	3	1	4	1	1	0	2	2	2	1	0	0	2	3	3	2	3	2	0	0
134	18	1	3	1	1	4	22.4913	2	0	3	1	1	2	3	0	0	3	1	0	0	2	0	2	1	0	0	0
135	22	0	3	1	4	3	19.79	2	0	3	1	1	0	1	1	1	2	0	2	3	1	1	1	3	2	0	0
136	21	1	3	1	3	3	24.1115	2	0	3	1	0	1	1	0	0	3	3	3	3	3	3	3	1	2	1	0
138	19	1	3	1	2	3	25.3906	3	1	3	1	1	0	2	0	0	0	1	1	3	2	1	1	1	0	1	1
140	19	1	3	1	1	4	20.679	2	0			3	3	2	3	3	2	3	3	3	1	1	1	2	1	1	1
141	18	1	3	1	1	4	21.3382	2	0	3	1	0	1	1	0	3	2	1	0	3	2	2	3	2	2	1	0
142	19	1	3	1	1	4	25.711	3	1	4	1	0	2	2	1	0	1	0	2	3	3	3	1	3	0	1	0
143	19	1	3	1	1	4	23.1834	2	0	4	1	0	1	0	2	1	0	1	3	3	3	3	3	1	0	1	1
144	19	1	3	1	1	4	19.8413	2	0	4	1	2	2	1	0	0	2	2	0	3	2	1	2	2	1	1	0
145	18	1	3	1	1	4	18.9292	2	0	4	1	0	0	0	0	0	0	0	2	2	0	0	1	0	0	0	0
146	18	1	3	1	1	4	22.4059	2	0	4	1	1	2	1	1	3	0	2	3	3	2	3	3	1	2	1	1
147	19	1	3	1	1	4	25.1486	3	1	4	1	0	3	0	0	0	1	2	3	3	2	2	0	1	0	0	0
148	18	1	3	1	1		28	3	1			2	3	2	0	0	0	3	0	2	2	1	0	0	2	1	1
149	18	1	3	1	1	4	27.1809	3	1	3	1	0	2	1	2	3	3	3	3	1	3	1	0	3	1	1	1
150	18	0	3	1	1	4	22.0932	2	0	3	1	1	0	1	0	0	1	1	0	3	3	3	1	2	0	0	0
151	18	0	3	1	1	4	29.3524	3	1	3	1	2	1	3	1	0	3	3	3	3	2	1	1	3	1	1	0
152	19	1	3	1	1	4	16.2278	1	0	4	1	0	1	0	0	1	1	1	3	2	2	1	1	2	2	1	0
153	19	1	3	1	1	4	24.8358	2	0	3	1	1	2	1	0	1	2	3	2	3	1	1	2	3	1	3	1
154	20	1	3	1	1	4	26.4721	3	1			0	1	0	0	0	3	2	0	2	3	1	3	0	1	0	1
155	19	1	3	1	1	4	17.8465	1	0	3	1	0	0	1	0	0	3	2	1	2	3	2	0	1	2	0	0
156	18	1	3	1	1	4	18.2868	1	0	3	1	0	0	3	0	0	3	3	3	3	1	2	3	1	2	2	0
157	18	0	3	1	1	4	21.4533	2	0	3	1	2	1	1	1	0	3	0	2	3	2	1	2	1	0	0	0
158	18	1	3	1	1	4	20.5693	2	0	3	1	1	1	3	0	0	0	3	3	3	2	3	2	0	1	0	1
159	19	1	3	1	1	4	29.0006	3	1	4	1	0	0	1	0	0	3	3	1	3	3	3	2	3	1	1	0
160	21	1	3	1	1	4	20.1348	2	0	3	1	1	0	3	0	0	0	1	3	3	2	0	2	0	0	1	1
161	20	1	3	1	2	4	21.0828	2	0	4	1	2	2	1	1	3	2	2	3	3	3	3	1	3	3	3	1
162	23	1	3	1	1	3	24.4898	2	0	2	0	0	2	1	2	1	2	0	3	3	1	1	1	1	1	1	1
163	19	1	3	1	1	3	25.204	3	1	3	1	3	1	1	0	1	2	1	1	3	3	2	1	3	3	1	1
164	21	1	3	1	1	4	26.9531	3	1	3	1	1	1	1	3	3	1	3	3	1	1	0	0	0	0	1	1
165	18	0	3	1	1	3	20.2449	2	0	2	0	0	1	2	1	1	2	2	3	3	2	2	1	3	3	2	0
166	25	1	3	1	5	4	19.052	2	0	3	1	0	0	1	0	0	0	0	3	2	2	1	1	2	0	0	0
167	19	1	1	0	2	2	24.7252	2	0	2	0	1	0	1	1	2	3	1	2	3	3	3	3	2	2	2	1
168	21	1	1	0	2		25.9516	3	1	3	1	1	2	0	1	2	2	3	1	3	2	3	2	1	1	1	0
169	19	1	1	0	2	2	22.4913	2	0			1	1	3	3	1	2	0	3	3	3	3	3	2	3	2	1
170	19	1	3	1	2	4	20.5693	2	0	4	1	1	1	2	0	1	1	1	3	2	3	2	1	1	1	1	1
171	20	1	3	1	2	4	21.7555	2	0	4	1	1	1	1	0	0	0	1	3	3	3	3	2	3	2	2	0
172	20	1	3	1	2	4	22.3214	2	0			0	1	2	0	0	1	3	3	3	3	3	1	3	1	2	0
173	21	0	3	1	2	4	25.2092	3	1	4	1	1	0	1	1	0	0	0	1	1	1	1	1	0	1	1	1
174	20	1	3	1	2	4	23.6203	2	0	4	1	1	1	2	1	2	1	1	2	3	3	2	2	3	1	1	0
175	19	1	3	1	2	4	17.7999	1	0	4	1	0	0	3	1	1	2	3	2	3	3	3	3	3	0	2	0
176	19	1	3	1	2	4	22.4996	2	0	3	1	0	1	1	0	0	1	1	2	3	2	2	2	3	1	1	1
177	19	1	3	1	2	4	29.7521	3	1	4	1	0	3	0	0	3	0	2	3	3	2	2	2	2	2	1	1
178	20	1	3	1	2	4	20.3125	2	0	4	1	0	2	2	3	0	3	0	3	3	2	1	1	3	1	0	0
179		1	3	1	2	4	19.1467	2	0	4	1	3	1	1	0	0	0	1	0	3	1	1	1	0	1	0	1
180	20	1	3	1	2	4	20.4467	2	0	3	1	0	1	0	0	1	3	2	3	2	1	1	1	3	2	1	0
182	19	1	3	1	2	4	25.2595	3	1	3	1	2	1	1	1	2	3	0	3	3	1	2	1	1	0	0	1
183	19	1	3	1	2	4	24.1415	2	0	4	1	2	0	0	2	2	0	3	3	3	3	3	1	0	1	2	1
184	21	1	3	1	2	4	19.3452	2	0	3	1	1	3	2	0	1	2	2	3	3	0	0	0	0	3	0	1
185	20	0	3	1	2	4	23.1481	2	0	3	1	2	0	2	2	3	3	1	3	3	2	1	0	2	2	1	0
186	19	0	3	1	2	4	22.9591	2	0	4	1	1	1	1	1	3	1	0	0	2	2	2	1	3	1	2	0
187	19	1	3	1	2	4	22.8571	2	0	3	1	1	3	2	0	0	1	0	3	3	3	2	1	3	1	3	1
188	24	1	3	1	2	4	20.0773	2	0	3	1	3	2	3	3	1	3	2	3	3	2	3	1	1	1	1	1
189	20	1	3	1	2	4	21.0962	2	0	4	1	0	1	0	0	0	0	1	3	3	2	1	0	1	1	1	1
190	21	1	2	0	3	4	21.6713	2	0	4	1	0	1	1	1	3	0	0	2	2	2	2	2	0	1	0	1
191	18	1	3	1	2	4	19.3337	2	0	4	1	1	2	1	0	0	3	2	3	3	3	1	1	2	2	2	1
192	19	1	3	1	2	4	21.2183	2	0	3	1	1	1	1	0	0	0	1	1	3	3	1	1	2	1	1	1
193	21	1	3	1	2	4	21.3593	2	0	4	1	1	1	2	0	0	0	1	1	3	2	2	1	3	2	1	0
194	18	1	3	1	2	4	24.5089	2	0	2	0	1	1	2	0	1	0	3	2	3	3	1	2	2	1	1	0
195	19	1	3	1	2	4	28.6048	3	1	3	1	2	1	2	0	0	1	1	3	3	1	2	2	2	1	1	0
196	19	1	3	1	2	4	26.8386	3	1	3	1	1	1	1	1	1	1	2	3	3	0	0	0	3	0	1	0
197	19	1	3	1	2	4	28.125	3	1	3	1	0	1	0	0	0	2	3	3	1	3	3	3	0	2	0	1
198	19	0	3	1	2	4	30.0947	4	1	3	1	1	1	2	2	2	2	2	0	3	2	2	2	2	2	1	1
199	21	0	3	1	2	4	22.014	2	0	3	1	1	0	0	2	3	3	0	2	3	2	1	0	3	2	3	0
200	20	1	2	0	3	4	21.1553	2	0	4	1	1	0	1	0	0	0	0	2	3	1	3	1	1	1	1	0
202	19	1	1	0	2	2	18.7305	2	0	3	1	1	1	2	0	0	0	2	0	3	3	2	2	3	0	2	0
203	19	1	1	0	2	2	31.378	4	1	3	1	2	1	2	0	2	2	3	3	2	1	0	1	2	1	0	0
204	19	1	1	0	2	2	28.7356	3	1	3	1	1	1	2	0	0	1	2	3	3	2	1	1	1	1	1	1
205	29	1	1	0	2	2				4	1	1	0	0	2	2	2	3	3	2	3	3	2	3	3	3	0
207	20	1	1	0	2	2				3	1	2	1	2	2	2	0	3	3	3	3	3	3	1	2	3	1
208	20	1	1	0	2	2	24.977	2	0			0	1	2	2	3	1	0	3	2	3	2	3	0	1	2	0
209	19	1	1	0	2	2	24.4898	2	0	2	0	1	0	3	0	0	3	0	3	3	3	1	3	3	3	2	1
211	19	1	1	0	2		19.8839	2	0	3	1	1	3	3	1	1	2	2	0	2	3	3	3	3	1	3	1
212	39	1	1	0	2	2	17.9687	1	0	3	1	2	2	3	3	3	1	2	3	3	2	2	2	2	2	2	1
213	19	1	1	0	2	2	21.2245	2	0	3	1	1	1	0	0	3	0	1	3	3	3	1	3	3	3	3	1
214	24	1	3	1	5	3	23.0112	2	0	3	1	1	1	2	1	3	2	3	0	3	2	3	3	2	0	1	1
215	21	1	3	1	2	4	22.1297	2	0	3	1	1	1	2	0	3	3	0	0	3	2	3	3	3	2	0	1
216	23	0	3	1	2	3	28.0863	3	1	4	1	0	0	1	0	0	0	2	2	2	3	2	1	3	1	0	0
217	24	1	3	1	2	4	24.0882	2	0	3	1	1	1	2	0	0	1	1	3	1	3	3	3	3	1	2	0
218	19	1	3	1	2	4	19.4771	2	0	3	1	1	0	3	2	3	0	1	0	3	2	3	2	1	1	0	1
219	19	1	3	1	2	4	22.46	2	0	4	1	2	0	3	0	0	0	0	1	2	3	2	1	3	3	2	1
220	20	1	1	0	3	4	23.7118	2	0	4	1	1	2	1	1	1	0	2	3	3	1	2	1	2	2	1	0
221	21	0	1	0	3	1	29.7265	3	1	4	1	1	1	1	0	0	2	0	1	1	3	1	1	3	1	1	1
222	20	0	1	0	3	1	23.7812	2	0	3	1	1	0	2	1	2	1	1	1	1	3	1	1	2	1	2	1
223	21	1	1	0	3	4	18.8271	2	0			1	0	3	0	3	3	0	3	3	3	2	3	3	3	1	0
224	21	1	1	0	3	1	22.5827	2	0			1	0	0	2	1	3	1	1	3	2	1	2	1	1	0	1
225	25	0	1	0	4		22.3517	2	0	3	1	1	1	1	0	0	1	0	1	0	2	2	0	2	1	2	0
226	24	1	1	0	3	4	17.9982	1	0	2	0	2	1	0	0	0	0	1	3	3	3	2	3	1	1	2	0
227	24	1	3	1	2	4	18.6709	2	0	3	1	0	0	1	0	1	1	3	3	2	2	2	2	1	1	1	0
228	20	1	3	1	2	4	19.4771	2	0	2	0	0	1	3	0	0	1	0	2	3	1	1	1	1	0	0	1
229	18	1	3	1	2	4	20.5761	2	0	3	1	0	1	0	0	0	0	1	3	3	2	1	1	1	1	0	1
230	19	0	3	1	2	4	22.3435	2	0	3	1	0	0	1	1	3	3	0	3	3	1	2	1	1	2	0	1
231	21	1	3	1	3	3	17.9982	1	0	3	1	2	0	1	0	0	3	3	2	2	3	1	0	2	0	1	1
233	20	1	3	1	3	3	16.5901	1	0	3	1	1	0	1	0	0	0	0	3	2	3	3	3	0	2	2	0
234	20	1	3	1	2	4	19.1111	2	0	3	1	0	1	2	2	3	3	1	1	2	2	2	1	1	0	0	1
236	19	0	3	1	2	4	26.8274	3	1			0	2	0	1	1	1	0	1	3	2	0	1	3	0	2	0
237	20	1	3	1	2	4	21.3675	2	0	4	1	2	1	2	0	0	1	2	3	3	3	2	1	3	2	1	1
238	19	1	3	1	2	4	20.3074	2	0	4	1	0	2	1	0	0	1	0	3	3	3	2	1	2	2	1	0
239	20	1	3	1	2	4	24.6097	2	0	4	1	2	1	3	0	0	2	0	3	3	3	3	3	1	1	1	0
241	20	1	2	0	3	4	22.719	2	0	3	1	1	2	0	0	0	3	1	3	3	2	2	2	3	1	1	1
242	20	1	2	0	3	4	21.3382	2	0	3	1	1	1	3	0	0	0	2	1	3	2	2	2	3	0	1	0
243	19	1	2	0	2	4	24.3025	2	0	4	1	3	1	1	0	0	1	0	2	2	3	2	2	3	1	0	0
244	22	0	2	0	3	4	18.9388	2	0	4	1	2	1	1	1	1	3	0	1	3	2	1	3	1	3	1	0
245	20	1	3	1	2	4	25.9107	3	1	3	1	0	2	3	0	0	0	1	1	3	2	1	1	3	2	3	1
246	20	1	2	0	3	4	21.4536	2	0	3	1	2	1	1	3	3	3	1	3	3	3	3	3	3	3	3	1
247	20	1	1	0	2	2	25.6544	3	1	3	1	1	2	3	3	3	2	1	3	3	3	2	3	3	2	3	0
248	19	1	3	1	2	4	21.6713	2	0	3	1	0	0	0	0	0	1	3	3	3	1	0	1	3	1	1	0
249	20	0	3	1	1	3	23.4586	2	0	3	1	2	1	2	2	1	2	2	2	3	3	1	1	2	2	3	0
251	24	1	1	0	2	3	22.3133	2	0	2	0	3	1	2	3	3	3	3	2	3	2	2	2	3	1	3	0
252	20	1	1	0	2	3	23.3887	2	0	3	1	0	0	3	3	0	2	0	3	3	3	3	3	2	1	1	1
253	19	1	1	0	2	3	24.1588	2	0	2	0	2	2	1	0	0	0	0	1	3	2	1	0	0	2	1	1
254	20	1	1	0	2	2	22.0386	2	0	3	1	1	1	2	2	1	2	2	0	3	2	2	2	1	1	1	1
255	21	1	1	0	2	3	23.0104	2	0	2	0	0	0	0	0	0	0	1	3	3	1	0	1	0	1	2	0
256	19	1	1	0	2	3	22.8625	2	0	3	1	0	0	1	0	0	1	0	1	3	3	1	1	1	1	3	0
257	20	1	1	0	2	3	22.6757	2	0	3	1	2	1	3	0	0	0	1	3	3	3	1	1	1	3	1	0
258	19	1	1	0	2	3	20.3954	2	0	3	1	1	2	3	0	0	3	3	3	3	3	3	3	2	0	1	0
259	19	1	1	0	2	3	23.3067	2	0	3	1	0	0	1	0	0	0	1	3	3	2	1	2	0	0	0	1
260	19	1	1	0	2	3	26.0386	3	1	3	1	1	0	0	0	0	0	0	0	3	2	0	1	1	3	2	0
262	20	1	1	0	2	2	21.1073	2	0	4	1	1	1	0	1	1	2	0	2	2	3	3	3	3	3	1	1
263	23	1	1	0	2	2	22.7615	2	0	3	1	0	1	1	0	0	0	3	3	3	3	2	2	3	2	3	1
264	21	1	1	0	2	2	28.9062	3	1	3	1	0	3	0	0	0	0	0	0	1	3	0	1	0	2	3	1
265	19	1	1	0	2	2	28.125	3	1	3	1	1	1	1	1	2	0	0	0	3	1	0	1	2	2	1	1
266	22	0	1	0	4	4	25.1429	3	1	4	1	1	1	1	1	1	2	0	0	3	2	3	1	3	2	3	1
267	22	0	1	0	5	3	23.1481	2	0	4	1	0	0	1	2	2	1	0	2	2	2	2	1	3	2	1	0
268	21	0	1	0	4	4	20.8086	2	0	3	1	1	1	2	2	3	2	0	3	3	3	3	3	3	2	2	1
269	23	1	1	0	4	4	19.7055	2	0	4	1	1	2	2	1	1	2	1	2	2	2	3	3	3	2	0	0
270	21	1	1	0	4		28.1625	3	1	4	1	1	1	1	0	0	0	0	1	2	2	2	2	3	1	2	1
271	18	1	3	1	1		19.5312	2	0	4	1	2	2	0	0	0	1	2	3	3	1	0	0	1	2	1	1
272	18	1	3	1	1	4	21.4109	2	0	2	0	0	1	2	0	0	1	1	3	3	2	2	2	1	1	1	0
273	18	1	3	1	1	4	25.3906	3	1	4	1	1	0	1	0	1	3	1	3	3	2	2	1	1	3	1	1
274	20	1	3	1	1	4	20.8117	2	0	2	0	0	2	2	2	3	3	0	1	2	1	2	1	0	1	1	0
275	22	0	1	0	4		31.1419	4	1	3	1	0	0	1	1	1	2	2	0	2	3	3	2	2	2	3	1
276	21	0	1	0	4	1	21.2953	2	0	4	1	1	0	1	2	2	1	3	0	3	3	3	2	3	2	1	1
277	20	1	1	0	4	1	21.3593	2	0	4	1	1	1	2	3	2	2	3	3	3	3	3	2	1	2	3	1
278	27	1	1	0	4		18.2066	1	0	2	0	1	1	1	0	0	2	2	1	3	2	1	1	1	0	1	1
279	21	0	1	0	4	1	31.7312	4	1	3	1	2	3	3	3	3	0	2	0	3	2	1	1	2	2	1	0
280	21	0	1	0	4	1	28.7317	3	1	4	1	1	1	1	3	3	3	2	2	3	3	2	2	2	2	2	0
281	21	0	1	0	4	1	31.3541	4	1	4	1	2	1	1	0	2	0	3	0	2	3	3	3	1	1	3	1
282	22	1	1	0	4	1	23.634	2	0	4	1	1	1	3	0	0	0	1	3	3	3	2	3	2	0	2	0
283	22	1	1	0	4	1	21.0937	2	0			0	1	1	0	0	0	0	2	3	3	3	1	3	2	3	0
284	23	1	1	0	4	1	21.6713	2	0	4	1	0	1	0	0	0	0	0	1	3	3	0	0	2	2	2	0
285	21	1	1	0	4	1	23.4236	2	0	2	0	0	0	0	0	0	0	1	3	2	3	0	0	1	1	0	1
286	22	0	1	0	4	1	22.6627	2	0	4	1	0	0	0	1	1	0	0	0	2	0	3	3	3	3	0	1
287	22	1	1	0	4		23.6614	2	0	3	1	2	2	1	1	1	1	1	2	2	3	1	1	2	2	1	0
288	21	1	1	0	4	1	27.7177	3	1	4	1	2	3	3	3	3	0	2	1	2	2	1	0	1	1	2	0
289	22	1	1	0	4	1	20.3244	2	0	3	1	1	1	2	3	3	3	3	3	3	2	1	1	0	0	1	1
290	24	1	1	0	4	3	21.2585	2	0	3	1	1	1	0	0	0	1	0	2	2	2	2	3	0	1	1	0
292	21	0	1	0	4	3	25.2595	3	1	4	1	1	1	1	0	0	1	0	1	3	3	3	2	3	2	3	0
293	22	0	1	0	4	3	31.8878	4	1	3	1	1	1	1	0	0	1	1	2	3	3	2	1	3	3	2	1
294	22	0	1	0	4	3	20.5151	2	0	2	0	0	0	0	0	0	1	0	0	3	2	2	2	2	2	2	1
295	24	1	1	0	4	3	22.8571	2	0	1	0	0	1	0	1	3	2	2	3	3	2	2	2	1	1	1	1
296	27	1	1	0	4							2	0	1	0	0	0	2	1	0	3	2	1	3	2	1	1
297	22	0	1	0	4	3	23.5898	2	0	4	1	0	0	0	0	0	0	0	2	2	3	2	0	0	1	2	1
298	21	0	1	0	4	3	25.3086	3	1	4	1	0	0	3	3	3	0	3	3	1	3	2	3	0	3	0	0
299	22	0	1	0	4	3	24.2513	2	0	4	1	0	2	1	3	3	1	1	0	2	3	1	1	3	1	0	1
300	23	0	1	0	4	3	16.9753	1	0	3	1	0	0	0	1	2	2	0	0	3	2	2	1	3	2	2	0
301	21	1	1	0	4	3	19.4161	2	0	3	1	3	3	3	1	3	3	3	3	3	3	3	2	1	2	1	1
302	23	0	1	0	4	3	29.0548	3	1	4	1	2	2	3	3	3	0	1	2	1	3	3	3	3	1	1	0
303	21	0	1	0	4	3	26.2966	3	1	3	1	1	1	0	1	1	2	3	2	1	2	2	1	1	1	2	1
304	24	0	1	0	4		21.2585	2	0	2	0	0	0	0	0	2	3	0	0	3	3	2	2	3	2	0	1
305	28	0	1	0	4	3	31.5617	4	1	3	1	0	0	0	0	0	0	0	3	2	2	1	1	2	1	0	1
306	22	0	1	0	4	3	21.7993	2	0	3	1	1	1	1	2	2	1	2	1	3	3	2	2	2	2	2	1
307	21	1	1	0	4	3	19.0039	2	0	4	1	2	1	2	3	3	1	3	3	3	3	3	3	2	2	3	0
308	22	1	1	0	4	3	22.2291	2	0	3	1	2	2	2	1	0	1	3	3	3	3	2	2	1	1	1	1
309	21	1	1	0	4	3	21.9713	2	0	3	1	0	2	0	0	1	3	3	3	2	3	3	3	3	2	1	0
310	25	1	1	0	4		26.6389	3	1	4	1	0	1	0	1	1	0	0	1	3	3	2	3	3	2	3	1
311	19	0	3	1	1		22.6422	2	0	4	1	1	1	1	0	3	1	2	1	2	2	3	2	3	2	1	0
312	18	0	3	1	1	3	31.1951	4	1	4	1	0	0	0	0	0	0	0	1	3	2	1	3	3	2	1	0
313	20	1	3	1		3	23.8281	2	0	3	1	1	1	1	0	0	0	1	0	3	3	1	2	2	2	2	0
314	22	1	3	1	1	3	17.4449	1	0	3	1	0	0	0	0	0	1	0	2	3	1	1	1	3	0	0	1
315	20	1	3	1	1	3	19.052	2	0	1	0	1	0	3	0	3	3	2	3	3	3	1	1	3	0	0	1
316	26	0	3	1	1	3	22.3094	2	0	3	1	1	3	3	3	3	0	0	0	1	2	2	2	2	3	3	0
317	23	1	3	1	1	3	19.9481	2	0	3	1	1	1	3	2	1	3	1	1	3	1	1	1	2	2	1	1
318	23	1	3	1	1	3	21.4844	2	0	2	0	0	0	0	0	0	0	1	2	3	3	3	3	3	2	2	1
319	19	0	3	1	1	3	24.4193	2	0	3	1	0	0	0	0	0	2	3	0	3	3	3	3	0	0	1	0
320	34	1	3	1	2	3	23.3844	2	0	3	1	1	2	3	0	0	0	1	3	3	3	2	1	1	3	1	0
321	18	1	3	1	1	3	25.7117	3	1	2	0	2	1	2	0	0	0	3	3	3	2	2	1	2	1	1	1
322	18	1	3	1	1	3	16.1844	1	0	3	1	0	0	0	0	0	1	1	2	3	3	2	1	1	0	0	0
323	19	1	3	1	1	3	19.433	2	0	3	1	0	1	0	0	3	3	1	1	1	3	2	2	2	1	2	0
324	20	1	3	1	1	3	20.5761	2	0	3	1	1	0	2	0	0	0	1	0	2	0	1	0	0	2	3	1
326	18	1	3	1	1	3	20.202	2	0	3	1	2	1	3	1	0	1	0	2	3	3	3	3	2	2	2	0
327	19	1	3	1	1	3	20.5499	2	0	3	1	0	0	1	0	2	1	0	2	3	2	2	2	2	2	1	1
328	19	1	3	1	1	3	19.8413	2	0	3	1	1	2	3	0	0	2	0	1	3	0	1	1	2	2	2	0
329	18	1	3	1	1	3	21.875	2	0	4	1	1	1	0	1	0	2	0	1	1	0	0	0	3	1	1	1
330	24	1	3	1	1	3	19.9481	2	0	3	1	0	0	0	0	0	2	2	0	3	3	3	3	1	2	1	1
331	20	1	1	0	3	1	23.6128	2	0	3	1	1	1	0	0	0	1	1	2	2	2	2	2	1	2	2	1
332	21	1	1	0	3	3	25.0995	3	1	2	0	3	2	3	1	1	3	3	3	3	3	3	3	3	3	3	0
333	20	1	1	0	3	1	22.8624	2	0	3	1	0	1	0	0	1	3	0	0	2	1	2	1	3	1	1	0
334	20	0	1	0	3	1	25.1063	3	1	4	1	1	0	0	0	0	3	0	2	3	3	3	3	3	1	2	0
335	21	1	1	0	3	1	27.3437	3	1	2	0	1	2	1	0	0	1	1	0	3	2	2	1	3	2	1	1
336	20	1	1	0	4	1	20.9644	2	0	3	1	1	1	1	3	3	3	2	2	3	0	0	0	0	0	0	1
337	20	1	1	0	3	4	19.433	2	0	4	1	1	0	0	2	0	3	0	1	3	2	1	0	3	2	2	1
338	22	1	1	0	3	1	26.9274	3	1	3	1	2	2	2	2	2	1	3	0	3	3	3	3	0	0	0	1
339	22	1	1	0	3	4	22.8329	2	0	3	1	1	2	0	3	3	2	0	3	3	3	3	2	3	3	2	0
340	20	1	1	0	3	4	18.0744	1	0	3	1	0	1	0	0	3	0	0	3	3	2	1	0	3	1	0	0
343	20	0	1	0	3	4	22.2291	2	0	3	1	0	0	1	2	2	1	0	2	3	2	3	2	1	1	1	1
344	20	0	1	0	3	1	24.8016	2	0	3	1	0	0	1	2	3	1	0	3	1	1	3	2	2	1	2	1
346	21	0	1	0	3	4	26.0299	3	1	2	0	1	0	1	1	3	1	1	1	3	1	1	0	0	1	1	0
348	20	1	1	0	3	4	20.3125	2	0	3	1	0	0	2	0	3	1	1	3	3	3	3	3	1	0	1	0
349	20	1	1	0	3	4	23.1405	2	0	3	1	0	1	1	0	0	0	0	3	3	3	1	2	1	0	0	0
350	21	0	1	0	3	1	24.6914	2	0	3	1	3	2	3	2	2	1	3	3	3	3	3	1	3	3	3	1
354	20	1	1	0	3	3						1	1	1	0	0	2	0	0	3	1	2	0	3	1	2	0
355	20	0	1	0	3	3	19.4667	2	0	3	1	2	1	1	1	2	3	0	0	3	3	1	2	3	3	2	0
356	26	0	1	0	3	3	23.597	2	0	3	1	1	1	1	1	1	0	0	2	2	2	1	1	1	2	1	1
357	24	0	1	0	3	3	31.0735	4	1	3	1	0	0	1	0	0	0	2	3	3	1	0	1	0	3	1	1
358	20	0	1	0	3	3	22.1598	2	0	2	0	1	0	1	0	0	0	3	3	3	2	1	1	2	1	1	1
359	30	0	1	0	3	3	29.685	3	1	3	1	1	1	1	1	3	0	2	0	2	3	1	0	0	2	1	1
360	21	0	1	0	3	3	24.5351	2	0	2	0	2	2	2	3	3	2	3	3	3	3	3	3	3	3	1	1
361	21	0	1	0	3	3	19.3792	2	0	3	1	1	0	1	0	0	2	2	0	3	3	0	1	0	0	1	1
362	21	0	1	0	3	3	20.1995	2	0	3	1	2	0	3	1	0	3	2	0	3	3	3	2	3	1	3	1
363	22	0	1	0	3	3	20.7612	2	0	3	1	1	3	1	1	0	3	0	3	3	1	1	0	1	2	0	1
364	21	0	1	0	3	3	20.7157	2	0	2	0	1	0	1	1	0	2	2	1	3	2	2	3	2	2	1	0
365	24	0	1	0	3	3	19.6052	2	0	3	1	3	0	2	2	2	3	3	3	2	1	3	0	3	1	2	0
366	23	1	1	0	4		30.7958	4	1	4	1	0	0	0	2	2	0	1	0	3	3	2	1	0	0	1	1
367	20	1	1	0	3	4				3	1	1	0	0	2	2	3	0	3	0	1	0	2	3	1	1	1
368	20	1	1	0	3	4	30.2072	4	1	3	1	0	1	1	1	1	1	0	2	3	3	2	2	2	1	1	1
369	19	1	1	0	3	1	23.4236	2	0	3	1	0	3	3	1	2	3	1	3	3	1	0	0	2	1	0	0
370	20	0	1	0	3	1	24.9445	2	0	2	0	1	0	0	0	2	2	0	3	3	1	3	3	3	2	1	0
371	19	1	1	0	2	2	28.4799	3	1	3	1	2	1	3	0	1	3	2	3	3	3	2	3	3	2	1	1
373	29	1	1	0	2	2	24.0346	2	0	4	1	1	2	3	0	2	0	2	3	3	3	3	1	3	2	2	0
374	19	1	1	0	2	2	20.6612	2	0	3	1	0	0	1	0	0	0	0	0	3	3	1	3	2	2	1	0
375	19	1	1	0	2	3	27.9155	3	1	3	1	2	2	2	2	2	1	1	0	3	3	3	3	3	2	2	0
376	19	1	1	0	2	2	27.3588	3	1	3	1	1	1	2	2	2	1	0	3	3	2	3	2	2	3	2	1
377	18	1	1	0	2	2	21.7994	2	0	2	0	0	0	0	1	1	2	0	2	3	3	1	0	0	1	1	1
378	19	1	1	0	2	2	17.8465	1	0	3	1	0	0	3	0	0	0	0	2	3	2	1	0	1	1	0	1
379	22	1	1	0	2	2	19.2277	2	0	3	1	1	0	1	0	0	1	0	1	3	3	1	0	0	1	1	0
380	19	1	1	0	2	2	22.8928	2	0	3	1	0	2	0	2	2	0	1	1	2	1	0	1	2	2	1	1
381	23	1	1	0	2	2	27.135	3	1	2	0	2	2	3	3	3	1	1	3	3	3	2	2	2	3	2	1
382	26	1	1	0	2		16.494	1	0	2	0	0	0	0	0	3	1	0	0	0	1	2	1	1	1	1	1
383	19	1	3	1	2	4	20.9366	2	0	4	1	2	1	3	3	3	1	3	3	3	3	3	3	3	1	2	0
384	19	1	2	0	3	4	19.8141	2	0	4	1	0	1	0	0	0	1	0	3	3	2	1	1	3	0	0	1
385	21	1	2	0	3	4	23.1834	2	0	3	1	0	1	3	2	3	2	2	3	3	3	1	1	3	2	1	1
386	20	1	2	0	3	4	17.935	1	0	2	0	1	0	0	1	2	1	0	3	3	2	1	0	3	3	1	0
387	21	1	2	0	3	4	22.0386	2	0	3	1	2	1	3	0	2	0	0	0	3	3	3	3	1	1	1	0
388	20	0	2	0	3	4	25.6055	3	1	4	1	0	1	0	0	0	0	1	1	3	2	1	1	0	2	1	0
389	26	1	2	0	4	4	20.0796	2	0	3	1	0	3	3	2	3	3	0	2	3	2	2	2	2	1	1	1
390	23	1	2	0	4	4	19.9219	2	0	3	1	0	0	1	0	0	1	2	1	3	2	1	3	3	1	2	0
391	22	0	2	0	4	4	25.464	3	1	4	1	0	2	3	1	2	1	2	3	3	1	2	1	2	3	2	1
392	22	0	2	0	3	4	20.5499	2	0	4	1	1	1	1	1	3	0	0	0	3	2	3	2	2	1	2	0
393	20	1	2	0	3	4	30.8532	4	1	3	1	0	1	3	1	3	2	1	0	0	3	2	1	3	1	0	1
394	22	1	2	0	4	4	20.7612	2	0	3	1	1	0	3	1	2	3	3	3	3	3	3	2	3	2	2	1
395	24	1	2	0	4	4	27.4077	3	1	3	1	2	3	3	3	3	3	2	1	3	3	3	1	0	1	1	0
396	21	0	2	0	3	4	23.4568	2	0	4	1	0	1	0	0	0	0	2	1	2	3	2	3	3	3	1	0
397	21	0	2	0	3	4	22.2222	2	0	3	1	1	1	0	0	1	2	0	0	1	2	1	1	1	2	2	1
398	20	0	2	0	3	4	20.0692	2	0	4	1	0	1	3	0	0	1	0	1	3	3	3	2	3	2	2	1
399	21	1	2	0	3	4	23.4236	2	0	3	1	2	2	3	0	2	0	2	3	3	3	2	3	2	1	1	0
400	21	0	2	0	3	4	24.6097	2	0	2	0	0	0	0	0	0	1	0	2	2	3	2	3	3	3	1	0
401	21	0	2	0	3	4	22.9819	2	0	2	0	1	1	1	3	3	1	1	3	3	3	3	2	2	2	2	0
402	21	0	2	0	3	4	25.3593	3	1	4	1	0	0	0	0	0	0	0	3	3	3	1	1	3	3	2	0
403	19	1	1	0	2	2	23.6244	2	0	3	1	1	0	1	0	0	1	0	3	3	2	1	3	1	2	2	0
404	22	0	1	0	2	2	23.1481	2	0	3	1	0	3	3	3	3	0	0	0	3	2	1	1	3	1	2	0
405	19	1	1	0	2	2	21.5139	2	0	3	1	1	1	1	0	0	0	3	1	3	2	1	0	2	0	2	0
406	18	1	1	0	2	2	25	3	1	3	1	1	1	2	2	0	2	1	0	3	2	2	2	1	1	1	1
407	19	1	1	0	1	2	21.7993	2	0	3	1	0	0	1	0	0	0	1	3	3	3	1	1	1	1	1	1
408	18	1	1	0	1	2	22.8928	2	0	3	1	1	1	3	0	0	3	1	0	1	3	0	1	1	0	0	0
409	19	1	1	0	1	2	20.5693	2	0			0	2	2	0	0	0	3	1	3	3	3	2	0	1	1	0
410	19	1	1	0	1	2	24.573	2	0	2	0	1	1	3	2	2	2	2	0	3	2	2	2	1	1	0	1
411	20	1	1	0	1	2	22.7904	2	0	4	1	2	2	1	1	3	3	0	3	3	2	3	3	3	2	2	0
412	19	1	1	0	1	2	16.263	1	0	3	1	0	0	2	3	3	3	0	3	3	3	2	2	3	0	2	0
413	25	0	1	0	5	3	23.3747	2	0	2	0	1	1	2	3	3	3	3	3	3	3	3	3	3	2	2	0
414	24	1	1	0	5		23.03	2	0	4	1	0	0	0	0	0	1	0	3	3	2	1	2	3	1	1	1
415	20	1	1	0	1	2	21.7738	2	0	2	0	1	3	1	0	3	1	3	3	3	2	1	0	3	2	2	1
416	23	1	1	0	1	2	38.866	4	1	3	1	1	1	2	0	0	0	2	3	3	2	2	1	2	1	3	1
417	18	1	1	0	1	2	21.4278	2	0	3	1	1	2	3	2	3	1	0	1	3	3	2	1	1	2	3	0
418	18	1	1	0	1	2	22.7244	2	0	4	1	2	1	1	2	2	2	1	3	2	2	2	2	3	0	1	1
420	18	1	1	0	1	2	30.0914	4	1	4	1	1	1	0	0	3	0	1	2	3	2	1	1	2	1	0	1
421	18	1	1	0	1	2	21.2585	2	0	3	1	1	2	1	0	1	3	0	1	2	2	2	1	1	1	1	1
422	18	1	1	0	1	2	23.8754	2	0	3	1	1	1	3	1	3	1	0	3	3	1	1	2	3	1	2	1
423	23	1	1	0	1	2	22.3529	2	0	3	1	1	0	1	3	1	0	0	0	3	3	3	1	3	1	3	1
424	20	1	1	0	1	2	20.6852	2	0	3	1	0	1	1	1	1	1	1	1	0	2	1	2	0	1	1	0
425	19	0	1	0	1	2	30.1038	4	1	3	1	1	0	0	0	1	2	0	0	3	0	1	1	2	1	0	1
426	18	0	1	0	1	2	21.2245	2	0	3	1	0	0	1	1	2	3	2	3	3	3	3	3	3	3	2	0
427	22	0	2	0	4	4	21.3839	2	0	3	1	0	1	0	3	3	1	0	3	2	2	2	2	2	2	1	1
428	21	1	2	0	4	4	17.5781	1	0	4	1	0	1	0	2	2	1	2	1	3	3	2	1	2	2	2	0
429	23	1	2	0	4	4	26.1719	3	1	3	1	1	1	1	1	3	1	0	1	3	3	1	1	2	1	1	1
430	23	1	2	0	4	4	21.5451	2	0	4	1	1	1	1	0	0	0	0	2	3	2	1	1	3	2	2	1
432	22	1	2	0	4	4	26.7094	3	1	4	1	1	1	3	0	0	1	1	0	3	2	1	1	3	1	2	1
433	23	0	2	0	5	4	22.9819	2	0	4	1	1	1	1	2	2	0	0	0	3	2	2	1	3	2	2	1
434	21	1	2	0	4	4	26.6667	3	1	3	1	2	1	2	2	2	3	0	1	3	2	3	1	3	2	3	0
435	19	1	3	1	1	4	21.6713	2	0	2	0	0	1	2	0	0	1	1	3	3	3	3	1	2	2	1	0
436	24	1	1	0	4		17.2248	1	0	2	0	0	1	3	0	0	2	1	0	3	3	2	2	2	2	2	0
437	22	1	1	0	4	3	22.719	2	0	3	1	2	1	0	1	1	0	1	1	1	3	3	2	1	2	2	1
438	23	0	1	0	4	3	28.7274	3	1	3	1	1	0	2	0	0	0	0	1	3	3	2	0	2	1	1	0
439	22	0	1	0	4	3	25.4327	3	1	3	1	0	2	0	3	3	3	0	3	3	3	3	2	3	2	3	1
440	23	0	1	0	4	3	27.3982	3	1	3	1	1	1	0	1	1	1	0	3	3	3	2	1	3	2	3	0
441	21	1	1	0	4	3	25.9516	3	1	3	1	2	1	1	0	0	0	0	1	2	2	1	1	0	0	1	0
442	22	1	1	0	4	3	22.6562	2	0	4	1	2	1	1	2	2	0	0	2	0	1	0	0	1	0	0	1
443	24	1	1	0	5	3	21.7784	2	0	3	1	3	3	2	3	3	3	3	0	3	2	3	3	2	1	1	1
444	24	0	1	0	4	3	22.9568	2	0	4	1	3	2	3	3	3	0	2	0	3	3	3	3	3	2	2	1
445	20	1	1	0	4	1	23.4375	2	0	4	1	2	2	3	3	3	1	3	3	3	3	3	3	3	3	2	1
446	21	0	1	0	4	1	19.5918	2	0	3	1	1	0	2	0	0	0	0	0	0	3	1	0	1	3	3	0
447	29	0	1	0	4	1	39.9866	4	1	3	1	1	0	2	2	2	1	2	0	1	3	3	2	1	1	1	0
449	22	1	1	0	4	1				3	1	1	0	0	0	1	1	1	0	2	3	3	3	3	3	3	0
450	27	0	1	0	4	4	19.3502	2	0	3	1	1	1	1	1	2	2	2	0	2	1	3	1	3	1	1	0
451	21	0	1	0			22.2222	2	0	2	0	0	1	2	3	3	3	0	3	3	3	2	1	2	0	2	0
452	22	0	1	0	4	1	22.2753	2	0	2	0	1	1	1	1	1	2	1	2	3	2	1	1	2	1	2	0
453	23	1	1	0	4	1	21.4536	2	0	3	1	0	1	0	1	0	2	0	0	2	1	1	1	0	0	1	1
454	22	0	1	0	4	1	16.263	1	0	2	0	0	2	1	2	0	2	0	3	3	3	2	0	1	2	1	0
455	25	1	1	0	5	4	20.1953	2	0	3	1	2	1	0	1	1	1	2	3	3	3	3	2	1	1	1	1
456	22	1	1	0	4	4	22.8624	2	0	3	1	2	3	1	1	0	0	0	0	1	2	2	2	1	1	1	0
457	23	0	1	0	5	4	24.5089	2	0	4	1	2	1	0	3	2	3	1	0	3	3	3	2	3	1	1	1
459	29	0	1	0	4	3				3	1	1	1	1	1	1	1	0	0	3	3	3	3	3	3	3	1
460	21	0	1	0	4	3	21.6049	2	0	3	1	1	1	0	2	3	3	0	2	2	2	2	2	2	2	2	0
462	22	1	1	0	4	3	19.0677	2	0	3	1	0	0	1	0	0	2	1	0	3	2	2	0	2	0	2	1
462	19	1	1	0	3	3	34.6021	4	1	2	0	1	0	2	0	0	0	2	1	3	2	1	0	0	0	0	1
464	20	1	1	0	3		19.9219	2	0	3	1	0	0	1	2	2	3	1	1	3	1	1	1	1	2	2	1
465	28	1	1	0	3		18.0662	1	0	3	1	0	0	0	0	0	0	3	3	3	3	2	3	1	1	0	0
466	23	1	1	0	4	3	20.9042	2	0	3	1	1	1	2	0	0	0	0	1	1	1	1	1	1	1	1	1
467	25	0	1	0	3	3	29.0657	3	1	3	1	1	2	0	0	2	2	1	3	3	0	1	0	0	1	0	1
468	24	0	1	0	3		17.9012	1	0	2	0	3	3	3	3	2	3	1	0	1	1	1	3	3	2	2	1
469	23	0	1	0	4	4	26.3958	3	1	3	1	3	3	3	3	3	3	3	3	3	3	3	3	3	3	3	0
470	27	0	1	0	5	3	17.1563	1	0	3	1	0	0	1	0	0	1	0	3	3	3	1	0	3	1	0	0
471	20	0	1	0	2	1	23.3747	2	0	1	0	1	1	1	0	0	1	0	1	3	2	1	1	2	1	2	0
472	18	0	1	0	1	3	22.1526	2	0	3	1	2	0	3	3	3	3	0	1	2	3	1	3	3	3	3	0
473	19	1	1	0	1	3	18.6709	2	0	2	0	1	0	2	0	2	2	2	1	0	1	3	1	3	2	3	0
474	20	1	1	0	2	3	19.9594	2	0	3	1	0	0	2	1	0	1	3	1	0	3	3	1	3	0	0	0
475	22	1	1	0	4		26.0375	3	1	3	1	1	0	1	0	1	3	0	0	3	3	3	1	3	3	3	1
476	21	1	1	0	3	4	19.1406	2	0	4	1	1	3	2	2	2	2	3	3	2	3	2	2	3	2	2	0
477	19	0	3	1	1	3	22.8571	2	0	4	1	0	0	1	1	0	0	2	1	3	3	2	1	2	2	1	0
478	18	0	1	0	1	1	22.6627	2	0	4	1	1	2	2	3	3	1	1	3	3	3	2	1	3	2	2	0
479	20	0	1	0	1	3	18.4992	1	0	4	1	0	0	1	1	3	3	0	0	3	3	3	1	3	3	3	0
480	20	0	1	0	1	3	23.5102	2	0	3	1	0	1	2	3	3	3	0	1	3	3	3	1	1	3	3	0
481	26	0	1	0	2	1	31.237	4	1			1	2	0	3	3	3	0	1	2	1	2	1	2	1	3	1
482	30	1	1	0	4	3	27.6888	3	1	4	1	1	1	1	1	1	1	1	2	2	2	2	2	2	2	2	0
483	22	0	1	0	2	1	19.6232	2	0	4	1	1	2	0	2	3	2	1	3	3	2	1	1	3	3	2	0
484	21	1	1	0	1	3	18.6851	2	0	2	0	1	1	0	0	0	0	0	0	3	3	2	1	2	1	0	0
485	22	0	1	0	3	3	23.1481	2	0	4	1	2	1	0	0	1	3	1	2	3	3	3	3	3	3	3	0
486	19	1	1	0	2	3	20.0692	2	0	2	0	2	1	1	0	1	2	1	3	3	0	1	0	1	1	1	0
487	19	1	1	0	2	2	19.313	2	0	4	1	1	2	0	0	0	2	2	3	3	2	1	2	1	0	1	1
488	21	0	1	0	3	4	23.0388	2	0	4	1	3	3	3	3	1	2	0	0	2	3	3	3	3	2	2	0
489	20	0	1	0	2	4	18.4965	1	0	3	1	0	0	0	0	0	2	0	3	3	3	2	1	3	3	2	1
491	18	1	1	0	1	1	23.5883	2	0	3	1	1	1	2	1	0	0	0	2	3	3	2	1	1	1	1	0
492	22	0	1	0	2	1	19.6927	2	0	4	1	1	1	1	1	1	1	1	1	1	1	1	1	1	1	1	1
493	18	0	1	0	1	1	19.4444	2	0	3	1	3	3	3	2	2	3	1	3	3	3	3	3	3	3	2	0
494	24	0	1	0	4	3	22.7147	2	0	3	1	1	0	1	0	0	0	0	0	2	2	0	1	3	2	0	0
495	19	1	1	0	2	1	25.3906	3	1	2	0	0	1	1	0	0	3	3	3	3	3	1	1	2	1	1	0
496	22	0	2	0	5	4	27.4145	3	1	3	1	2	1	1	2	3	0	0	1	3	3	1	1	3	1	1	0
497	21	1	1	0	2	3	25.5296	3	1	2	0	0	0	0	0	0	1	2	3	3	3	1	1	0	1	1	1
498	20	0	1	0	2	1	20.0692	2	0	4	1	0	1	1	0	0	0	2	0	3	2	1	0	0	0	1	0
499	20	0	1	0	2		23.2912	2	0	4	1	1	1	2	3	3	2	3	2	3	3	3	3	2	2	2	1
500	23	0	1	0	5	1	23.4075	2	0	3	1	1	0	0	0	1	1	0	0	1	1	0	1	1	1	0	0
501	22	0	3	1	1	3	26.2976	3	1	4	1	1	1	1	1	3	1	0	0	3	3	3	2	2	2	1	0
502	22	0	1	0	2	4	24.6914	2	0	4	1	0	1	1	1	1	3	2	0	2	3	2	2	3	2	3	0
503	19	1	1	0	2	3	21.6311	2	0	3	1	0	0	3	0	0	0	0	3	3	2	3	2	3	2	2	1
504	19	1	1	0	1	1	19.4734	2	0	3	1	0	1	2	0	2	0	0	3	3	3	2	1	1	1	2	0
505	18	0	1	0	1	1	23.3887	2	0	2	0	0	0	0	0	0	3	0	3	3	0	0	0	0	2	0	1
507	22	0	1	0	4	3	20.3816	2	0	3	1	0	0	2	1	3	0	0	3	1	3	3	0	3	3	3	0
508	22	1	1	0	2	1	20.1956	2	0	2	0	1	1	1	0	0	0	1	1	3	2	1	0	2	0	1	0
509	19	0	1	0	2	1	20.0155	2	0	4	1	1	0	1	3	3	2	0	3	3	3	2	1	2	3	2	1
510	18	1	1	0	1	1	21.9363	2	0	3	1	1	1	1	0	2	2	0	3	3	3	3	1	2	0	2	0
511	18	1	1	0	1	1	19.1953	2	0	3	1	1	1	3	0	2	2	0	3	3	3	1	1	2	0	0	0
512	18	0	1	0	1	4	21.0667	2	0	4	1	1	1	3	3	3	2	1	3	3	2	2	2	3	3	2	0
514	20	0	1	0	1	3	21.1073	2	0	4	1	1	1	2	2	1	2	1	2	1	3	2	1	1	2	3	1
515	31	1	1	0	2	3	22.0522	2	0	2	0	2	2	3	3	3	0	2	3	3	3	3	3	1	2	1	0
516	20	0	1	0	1	3	20.202	2	0	4	1	0	2	1	0	0	3	3	2	3	3	3	2	3	2	1	0
517	20	1	1	0	1		20.0692	2	0	3	1	2	1	3	1	3	2	3	3	2	2	2	3	3	0	1	1
518	25	0	1	0	2	4	26.2346	3	1	3	1	1	2	3	3	3	1	2	3	2	2	2	1	3	3	3	0
519	19	1	1	0	2	3	22.7583	2	0	3	1	0	1	0	0	0	0	0	2	3	2	2	2	0	2	1	1
521	22	1	1	0	3	3	20.5761	2	0	4	1	0	1	0	1	3	1	2	1	3	3	2	1	1	3	1	1
522	19	0	1	0	2	2	20.6612	2	0	3	1	0	2	1	0	1	1	0	0	2	2	2	1	1	0	1	1
523	19	0	1	0	2	3	26.7086	3	1	4	1	1	1	1	1	1	1	0	1	3	2	3	3	3	3	2	0
524	20	0	1	0	2	4	33.9506	4	1	3	1	1	2	0	0	1	0	0	1	3	2	1	0	0	0	0	0
525	23	0	1	0	4	3	21.8871	2	0	4	1	1	1	0	1	2	1	1	2	2	2	2	1	1	1	2	0
526	22	0	1	0	3	4				4	1	0	0	1	0	0	0	2	3	3	2	1	0	2	1	1	0
527	18	1	1	0	1	1	17.6309	1	0	4	1	1	1	2	3	1	3	0	3	3	3	2	2	1	2	2	0
528	18	1	1	0	1	1	21.9671	2	0	3	1	2	1	3	1	2	3	2	3	1	3	2	3	3	1	2	0
529	18	0	1	0	1	1	28.7347	3	1	4	1	2	2	1	1	1	1	1	2	3	3	2	2	2	1	1	0
530	18	0	1	0	1	3	20.6758	2	0	3	1	1	1	0	3	3	3	0	3	3	3	2	1	2	2	2	0
531	25	1	1	0	2	1	28.3447	3	1	3	1	2	1	2	0	0	1	2	2	3	1	0	0	2	0	1	0
532	21	0	1	0	2	1	24.2123	2	0	3	1	1	1	0	0	0	0	0	0	3	1	1	0	1	1	0	0
535	18	1	1	0	1	3	22.6562	2	0	3	1	0	2	2	3	3	3	3	3	3	3	3	3	3	2	2	1
536	19	0	1	0	1	3	17.1753	1	0	3	1	1	1	2	1	0	2	2	3	3	1	1	2	2	1	1	0
537	24	0	1	0	5		27.1669	3	1	3	1	0	2	0	3	0	3	2	3	3	3	1	0	0	3	2	1
538	19	1	3	1	1	3	21.875	2	0	4	1	1	1	0	0	0	1	1	2	3	2	3	1	2	1	2	1
539	21	0	1	0	3	4	23.0546	2	0	4	1	1	3	2	2	3	0	0	0	3	3	3	2	2	2	1	0
540	18	0	1	0	1	1	23.0546	2	0	4	1	0	2	0	0	1	1	1	3	2	3	2	3	3	2	2	1
542	25	1	1	0	2	3	20.4491	2	0	2	0	2	2	2	3	3	3	1	0	2	2	3	3	1	2	1	0
543	23	0	1	0	1	3	22.4377	2	0	2	0	3	1	3	1	3	3	0	1	2	3	2	0	3	1	3	0
544	20	1	1	0	2	3	28.3039	3	1	4	1	1	1	0	1	3	0	1	0	2	3	3	3	1	2	2	0
545	20	0	1	0	2	4	23.6614	2	0	4	1	0	1	1	0	3	1	3	1	2	2	2	2	3	2	1	0
546	21	0	1	0	2	4	24.4857	2	0	4	1	1	2	1	1	2	2	2	0	3	2	2	2	2	1	2	0
547	21	1	1	0	1	3	20.5761	2	0	4	1	0	0	0	0	1	1	0	3	1	2	1	1	3	0	2	1
548	20	0	1	0	2	3	30.0232	4	1	4	1	1	1	1	0	0	0	2	0	2	2	1	3	3	2	2	0
549	20	1	1	0	2	4	17.782	1	0	3	1	0	1	1	0	0	3	0	3	3	3	2	0	1	0	0	1
550	18	1	3	1	1	3	20.0773	2	0	2	0	1	1	2	0	0	1	0	1	2	3	3	2	3	2	1	1
551	21	0	1	0	4		24.6914	2	0	4	1	1	1	3	3	3	0	3	3	3	3	3	3	3	3	3	0
552	18	0	1	0	1	1	25.4694	3	1	4	1	0	1	0	2	0	3	0	0	3	3	1	0	1	2	2	0
553	18	0	1	0	1	1	23.4509	2	0	4	1	1	1	2	1	2	2	0	3	3	3	2	2	1	1	1	0
554	18	1	1	0	2	3	24.3046	2	0	3	1	2	1	1	0	0	0	1	3	3	3	3	3	3	3	3	0
555	19	0	1	0	2	2	27.7575	3	1	3	1	0	2	0	0	3	3	0	3	3	2	3	2	3	2	2	0
556	29	1	1	0	2	3	21.4533	2	0	3	1	1	1	1	1	1	1	0	3	2	3	1	2	3	1	1	0
557	20	1	1	0	2	3	18.0427	1	0	2	0	0	0	0	0	2	2	1	0	2	3	2	2	2	2	2	1
558	19	0	1	0	2	3	23.6203	2	0	2	0	2	1	2	3	3	3	1	3	3	1	2	2	3	0	0	1
559	20	0	1	0	1	3	26.5927	3	1	3	1	1	0	0	1	3	0	0	3	3	3	3	2	3	1	1	0
560	21	1	1	0	2	4	20.202	2	0	2	0	2	2	1	0	0	0	1	0	3	3	3	3	3	3	2	0
561	19	0	1	0	2	2	30.4498	4	1	3	1	0	0	1	1	3	2	1	0	3	3	3	3	3	2	2	1
562	21	0	1	0	3	4	23.8498	2	0	4	1	1	1	1	2	2	2	0	3	3	3	2	2	3	3	1	0
563	18	1	1	0	1	1	23.1247	2	0	4	1	0	2	0	2	3	2	3	3	3	3	2	1	2	1	0	1
564	18	0	1	0	1	1	32.872	4	1	4	1	0	2	0	2	2	3	0	2	2	3	3	1	1	2	2	1
566	20	1	3	1	2	4	21.4536	2	0	3	1	1	1	1	1	3	1	2	1	2	2	2	2	2	1	2	1
567	22	1	3	1	2	4	20.5688	2	0	4	1	0	1	0	1	3	2	2	3	3	1	2	1	1	0	0	0
568	18	0	1	0	1	1	21.3859	2	0	4	1	2	1	3	1	0	2	0	1	3	2	3	3	3	2	1	1
570	18	0	1	0	1	1	22.6627	2	0	3	1	3	1	3	3	3	3	0	0	3	3	1	1	3	1	2	0
571	18	1	1	0	1	1	19.6283	2	0	3	1	1	1	2	0	0	3	2	3	3	3	2	3	3	3	2	0
572	18	1	1	0	1	1	19.8991	2	0	2	0	1	0	1	0	2	2	1	3	3	3	2	1	3	1	1	0
573	27	1	1	0	3		20.202	2	0	3	1	3	2	1	3	3	3	0	3	3	3	3	2	3	3	2	1
574	18	1	1	0	1	1	17.3313	1	0	3	1	1	1	2	1	1	2	2	3	3	1	1	2	1	1	1	1
575	21	1	1	0	1	1	17.022	1	0	2	0	0	0	0	0	0	0	0	1	3	0	1	0	0	2	0	0
576	22	0	1	0	1	1	23.6713	2	0	3	1	0	2	1	0	0	3	1	3	3	2	1	0	3	2	3	0
577	18	1	1	0	1	1	20.9644	2	0	2	0	2	1	1	2	2	2	0	0	0	2	2	2	3	0	2	0
578	19	0	2	0	1	4	21.3839	2	0	4	1	1	2	3	0	3	3	0	0	3	3	3	2	3	0	1	0
579	23	1	3	1	4	4	18.5568	2	0	3	1	0	1	0	0	0	0	0	3	3	3	2	1	3	1	1	0
580	22	0	3	1	5	4	19.8177	2	0	2	0	0	0	2	0	0	1	1	3	3	2	1	0	1	1	0	0
581	20	1	3	1	3	4	18.8092	2	0	3	1	0	0	1	0	0	0	2	0	3	3	1	3	0	3	1	0
582	22	1	3	1	4	4	25.2595	3	1	3	1	2	1	1	1	3	0	3	2	3	2	1	0	1	1	0	0
583	18	1	1	0	1	1	27.3437	3	1	4	1	1	1	2	0	0	3	3	0	3	3	1	1	3	1	1	1
584	19	0	1	0	1	1	32.0759	4	1			1	2	0	3	0	3	0	1	3	2	2	1	3	2	3	0
585	27	1	1	0	1	1	23.2335	2	0	2	0	2	0	0	1	1	3	1	1	1	3	3	3	3	0	1	1
586	18	1	1	0	1	1	19.9219	2	0	3	1	0	1	0	0	0	2	3	3	3	3	3	2	3	0	2	0
587	18	0	1	0	1	1	20.8333	2	0	4	1	1	2	1	0	1	2	1	3	3	2	1	2	3	2	1	1
588	20	1	1	0	1	1	22.8624	2	0	3	1	0	2	1	2	3	3	3	3	2	2	2	1	1	3	0	1
589	21	1	1	0	1	1	21.4844	2	0	3	1	1	1	1	0	0	0	2	0	3	2	1	2	2	2	1	0
590	18	1	1	0	1	1	22.2656	2	0	3	1	1	2	0	0	0	0	1	2	2	1	0	0	3	1	1	1
591	19	0	1	0	1	1	19.1358	2	0	4	1	1	1	0	0	3	2	0	1	0	3	3	1	3	1	1	1
592	20	1	1	0	1	1	25.8478	3	1	3	1	1	2	2	1	1	2	0	1	2	3	2	2	3	2	2	1
593	21	0	1	0	1	1	23.5294	2	0	3	1	0	0	1	0	1	3	2	2	2	1	2	1	2	1	1	0
595	23	1	3	1	4	4	29.7056	3	1	4	1	2	1	2	1	3	0	3	2	0	1	2	2	1	0	1	0
596	21	1	3	1	4	4	25.4327	3	1	4	1	0	1	1	0	0	0	2	3	3	3	2	2	3	2	2	0
597	30	0	1	0	4	1	21.6049	2	0	3	1	1	0	0	1	0	3	0	0	3	2	2	2	2	2	0	0
597	23	1	3	1	4	4	24.2187	2	0	4	1	0	0	2	0	0	0	0	0	3	3	0	1	0	1	0	1
598	21	1	3	1	3	4	18.424	1	0	2	0	0	0	2	0	0	0	1	1	3	3	3	3	1	1	1	1
599	23	1	1	0	3	1	21.9899	2	0	3	1	3	3	0	3	3	3	0	3	3	3	3	3	3	2	2	1
600	19	1	1	0	1	1	22.5981	2	0			2	0	0	0	0	1	0	2	3	3	3	2	1	1	1	1
601	18	1	1	0	1	1	23.597	2	0	3	1	3	0	1	0	0	2	1	3	3	3	1	0	2	1	2	0
602	18	1	1	0	1	1	19.1053	2	0	3	1	1	0	1	3	2	2	0	0	3	1	2	2	1	2	1	0
603	18	0	1	0	1	1	17.1655	1	0	3	1	3	0	1	0	0	1	1	0	3	1	1	1	1	1	1	1
604	18	0	1	0	1	1	23.8367	2	0	3	1	0	1	3	2	1	3	3	0	3	3	3	3	3	2	2	0
605	20	0	1	0	1	1	22.2222	2	0	4	1	2	2	1	1	1	0	1	0	2	2	2	1	3	2	3	0
606	18	1	1	0	1	1	25.7657	3	1	2	0	2	1	1	1	0	3	0	0	3	1	0	2	3	1	1	1
607	20	1	1	0	1	1	18.902	2	0	2	0	0	1	0	0	0	1	0	3	3	1	0	1	1	0	0	0
608	22	0	1	0	1	1	26.1493	3	1	1	0	1	0	1	0	0	1	0	1	3	2	1	1	1	1	1	1
609	18	0	1	0	1	1	28.6501	3	1	3	1	0	0	0	0	0	0	0	0	0	2	2	1	3	0	2	1
610	18	1	1	0	1	1	22.2063	2	0	2	0	0	1	0	0	0	1	0	1	1	2	1	0	1	0	0	1
611	19	0	1	0	1	1	22.6474	2	0	3	1	2	3	2	1	3	3	1	3	3	2	1	0	3	2	3	1
612	18	0	1	0	1	1	25.6489	3	1	3	1	0	1	1	2	3	3	0	3	3	0	0	2	1	0	1	0
613	19	0	1	0	1	1	21.4619	2	0	3	1	2	1	3	1	1	2	0	0	2	3	2	1	2	1	2	0
614	18	1	1	0	1	3	18.2563	1	0	3	1	0	3	2	0	0	0	3	3	2	2	2	1	3	2	2	1
615	22	1	1	0	4	3	24.6904	2	0	2	0	1	1	1	0	0	1	1	0	1	3	3	3	1	1	1	0
616	21	1	1	0	4	3	19.1358	2	0	3	1	0	1	0	0	0	0	0	3	1	2	1	1	0	0	1	1
617	31	1	1	0	4	3	30.863	4	1	2	0	1	1	1	0	1	1	1	2	3	1	2	1	1	0	1	0
618	28	1	1	0	4	3	26.9598	3	1	4	1	2	2	3	0	0	1	3	3	3	3	2	3	3	2	2	0
619	26	1	1	0	4	3	22.4059	2	0	4	1	1	1	3	0	3	0	0	2	2	3	2	2	0	1	0	1
620	25	1	1	0	4	3	21.9671	2	0	3	1	1	1	0	0	0	0	3	3	3	3	2	0	0	1	0	1
621	31	1	1	0	4	3	23.0518	2	0	2	0	3	0	3	2	3	0	3	3	0	0	3	3	1	1	0	1
622	35	1	1	0	4	3	21.2245	2	0	2	0	1	1	3	0	0	0	0	0	3	3	0	0	3	2	1	0
623	22	1	1	0	4	3	20.83	2	0	2	0	1	2	0	0	2	2	0	3	3	2	2	2	1	2	2	0
625	18	0	2	0	1	4	26.7755	3	1	4	1	3	2	3	2	3	1	0	3	3	3	3	1	3	3	2	1
626	18	1	2	0	1	4	21.0937	2	0	3	1	1	2	1	0	0	0	0	1	3	1	1	1	2	1	0	0
627	26	0	1	0	4	3	39.4464	4	1	2	0	1	2	1	2	1	0	1	0	3	2	2	2	2	2	2	0
629	29	1	1	0	4	3	38.0196	4	1	2	0	1	1	0	1	0	3	0	3	3	1	0	0	0	0	0	0
631	26	0	1	0	3	3	19.8347	2	0	3	1	3	1	2	3	3	3	0	0	3	3	3	3	3	0	3	1
632	21	1	1	0	4	3	25.5102	3	1	3	1	1	0	1	0	0	1	1	0	1	2	1	2	2	0	1	0
633	21	1	1	0	4	3	24.6548	2	0	3	1	0	0	3	0	0	2	0	0	3	3	1	3	1	0	3	1
634	21	1	1	0	4	3	25.9095	3	1	3	1	0	0	3	0	0	2	0	1	3	3	1	3	1	0	3	1
635	19	0	2	0	1	4	24.2123	2	0	3	1	1	0	0	2	2	1	0	2	3	2	2	1	2	2	3	1
636	19	0	2	0	1	4	28.5483	3	1	4	1	1	2	1	2	3	3	2	2	1	3	2	2	2	1	1	1
637	20	1	2	0	1	4	19.7777	2	0	2	0	1	0	1	1	1	1	2	3	3	2	1	1	1	1	1	0
638	18	1	2	0	1	4	29.0174	3	1	4	1	1	2	1	0	0	0	1	0	2	3	2	1	1	1	1	1
639	18	0	2	0	1	4	19.487	2	0	3	1	0	0	2	1	2	3	1	1	3	2	2	1	3	0	1	1
640	18	1	2	0	1	4	19.4674	2	0	3	1	2	3	2	0	0	1	0	3	1	2	2	0	0	0	0	0
641	20	1	2	0	1	4				4	1	1	2	1	2	3	0	1	3	3	3	1	0	2	1	1	0
642	18	1	2	0	1	4	21.5645	2	0	4	1	0	1	1	0	0	1	2	0	3	2	0	1	3	1	2	0
643	19	1	2	0	1	4	20.8325	2	0	3	1	1	1	0	0	0	1	0	3	3	2	1	0	3	2	1	1
644	19	0	2	0	1	4	16.6975	1	0	3	1	0	1	2	0	0	1	0	3	3	3	1	2	3	1	1	0
645	23	1	1	0	4	3	19.0039	2	0	2	0	1	2	3	1	2	3	1	1	3	2	2	2	1	1	1	1
646	27	1	1	0	4	3	24.0882	2	0	2	0	1	1	0	0	0	0	0	3	3	3	0	0	0	1	0	0
647	20	1	2	0	2	4	28.3531	3	1	4	1	2	1	1	2	3	0	3	2	2	3	3	1	1	0	1	0
648	21	1	2	0	2	4	33.305	4	1	3	1	1	1	2	3	3	1	0	1	3	2	3	1	0	0	1	1
652	18	0	1	0	1	3	21.8776	2	0	4	1	1	0	1	2	1	1	0	0	2	2	2	1	3	1	2	1
653	19	1	1	0	1	1	18.132	1	0	4	1	0	1	1	0	1	1	0	0	2	2	1	1	2	2	1	0
654	20	1	1	0	1	1	25.9095	3	1	3	1	2	1	2	1	3	2	2	0	2	3	2	3	3	2	3	1
655	22	0	1	0	1	3	18.0092	1	0	3	1	0	1	1	1	1	2	1	1	2	2	0	0	3	2	2	1
656	21	0	1	0	1	3	23.3747	2	0	2	0	2	2	1	2	2	2	2	0	3	2	2	2	2	1	2	0
657	24	0	1	0	3	3	21.4996	2	0	3	1	0	1	0	0	0	2	3	1	2	2	2	3	3	3	1	0
659	22	1	1	0	1	3	20.7612	2	0	2	0	0	0	1	0	0	0	0	1	3	1	1	0	1	1	2	1
660	18	1	1	0	1	3	18.3594	1	0	3	1	1	0	0	0	1	1	0	0	2	1	2	0	3	0	0	1
662	22	1	1	0	3	3	17.6471	1	0	2	0	0	1	1	1	0	3	1	1	3	2	1	1	3	0	1	0
663	23	1	1	0	3	3	33.8741	4	1	3	1	1	1	2	0	0	1	0	0	3	3	2	1	1	1	1	1
664	21	1	1	0	3	3	21.2585	2	0	3	1	2	2	1	0	2	1	2	2	2	2	3	1	1	2	1	1
665	21	0	1	0	3	3	24.8584	2	0	3	1	0	0	3	3	3	0	1	3	3	3	3	2	1	2	3	1
666	22	1	1	0	3	3	38.9348	4	1	3	1	1	1	2	1	1	0	1	0	2	3	2	1	1	1	1	0
667	27	0	1	0	3	3	32.4074	4	1	2	0	1	3	1	0	0	3	3	3	3	2	0	2	3	1	0	0
668	25	1	1	0	3	3	30.4687	4	1	3	1	3	3	2	3	3	0	0	0	3	3	3	2	0	2	1	1
669	31	0	1	0	5	3	23.7812	2	0	3	1	3	0	3	3	3	3	2	1	3	3	2	2	3	2	3	1
670	22	1	1	0	3	3	19.1001	2	0	2	0	2	1	2	0	0	3	1	1	2	2	2	2	3	3	3	1
671	20	1	1	0	3	3	17.9089	1	0	3	1	2	1	3	0	0	0	1	3	2	2	3	3	1	1	1	1
672	24	0	1	0	3	3	25.9455	3	1			1	1	1	0	0	0	0	0	3	3	3	2	3	1	3	0
674	20	0	1	0	3	3	23.3887	2	0			1	1	0	3	0	1	0	3	3	1	0	0	2	2	0	1
675	26	0	1	0	3		32.0095	4	1	3	1	1	2	3	1	3	3	3	0	3	2	2	1	1	2	0	0
676	23	0	1	0	3	3	23.5102	2	0	2	0	1	2	3	2	3	3	2	3	2	2	2	2	1	2	0	1
677	24	1	1	0	3	3	25.528	3	1	4	1	0	1	1	0	0	0	3	1	2	1	0	0	2	2	2	1
678	20	0	1	0	3	3	24.3911	2	0	3	1	0	1	0	0	1	0	0	3	1	2	0	0	2	0	0	1
679	34	1	1	0	3	3	29.6158	3	1	4	1	2	2	3	1	3	3	3	3	3	2	2	2	2	1	1	1
680	21	1	1	0	3	3	23.4375	2	0	3	1	2	1	3	0	0	1	3	2	3	2	3	1	1	2	1	1
681	20	0	1	0	3	3	24.6914	2	0	4	1	0	0	0	3	3	3	0	3	2	3	3	2	1	3	1	1
682	27	1	1	0	3	3	26.1719	3	1	3	1	1	1	2	2	2	0	1	3	3	3	1	1	0	2	1	0
683	22	0	1	0	3	3	24.1588	2	0	4	1	3	3	0	3	3	2	1	3	1	3	3	3	1	2	0	1
684	34	1	1	0	5	3	33.4977	4	1	2	0	1	2	2	3	3	1	3	3	3	3	3	1	2	2	1	0
685	33	0	1	0	3	3	26.8745	3	1	3	1	0	2	1	0	1	0	0	0	3	0	0	0	1	2	1	1
686	23	0	1	0	3		23.4075	2	0	3	1	1	1	1	1	2	1	2	0	2	2	1	1	2	1	1	0
687	22	0	1	0	3	3	23.0388	2	0	3	1	1	1	3	3	1	3	1	0	1	2	3	3	1	1	0	1
688	19	1	1	0	1	1	19.5312	2	0			0	1	0	0	0	0	0	3	3	3	0	3	3	1	2	1
690	22	1	1	0	1		20.4783	2	0	3	1	2	3	3	3	3	2	1	3	3	3	3	2	1	1	2	0
691	23	0	1	0	3		21.2953	2	0	4	1	0	1	0	0	3	0	0	3	2	1	1	3	0	1	0	1
692	18	1	1	0	1	3	19.5312	2	0	2	0	2	1	1	0	0	1	0	2	2	1	1	0	0	1	1	0
693	18	0	1	0	1	3	26.6728	3	1	3	1	2	1	1	0	0	3	2	0	2	3	2	0	3	1	0	0
694	20	1	1	0	1	3	24.2187	2	0	2	0	0	0	0	0	0	3	0	2	2	0	0	0	0	3	0	0
695	19	1	1	0	1	3	20.8086	2	0	3	1	0	0	0	1	1	3	0	0	2	2	3	3	3	1	1	1
696	23	0	1	0	1	3	29.7578	3	1	2	0	1	1	2	0	0	0	2	0	2	3	2	1	3	3	2	0
697	20	1	1	0	1	3	26.9531	3	1	2	0	0	0	0	0	0	0	3	1	3	2	0	3	1	2	0	1
698	34	0	1	0	1	3	32.3265	4	1	3	1	1	0	0	0	0	2	2	0	2	3	0	0	0	0	0	0
699	28	1	1	0	1	3	28.7317	3	1	2	0	1	1	0	2	1	2	3	3	1	2	2	1	0	1	0	1
700	18	0	1	0	1	3	20.8756	2	0	3	1	1	1	1	1	0	3	2	1	2	2	1	2	1	2	1	1
701	18	0	1	0	1	3	18.7242	2	0	3	1	3	2	2	2	2	3	1	3	3	2	3	2	3	2	3	1
702	20	0	1	0	1	3	20.6758	2	0	3	1	0	1	2	3	3	1	1	2	3	2	3	1	2	1	2	1
703	18	1	1	0	1	3	20.8209	2	0	3	1	1	1	0	0	0	0	1	3	3	2	2	0	3	1	0	0
704	19	0	1	0	1	3	18.1252	1	0	3	1	1	1	0	3	0	3	0	1	3	1	2	2	3	3	1	0
705	30	0	1	0	1	3	35.4938	4	1	3	1	1	1	0	2	0	2	1	2	3	2	1	1	0	3	1	0
706	19	0	1	0	3	2	25.8264	3	1	4	1	1	2	1	3	3	2	2	3	3	2	2	2	3	2	1	1
707	21	1	1	0	3	2	19.8347	2	0	4	1	1	1	1	0	0	0	0	3	3	3	2	2	2	1	1	1
708	20	0	1	0	3	2	22.3435	2	0	4	1	0	0	1	1	2	2	2	1	2	3	3	2	3	2	2	1
709	20	1	1	0	3	2	23.9224	2	0	2	0	3	3	3	3	3	3	2	3	3	3	3	2	3	3	3	1
710	21	1	1	0	3	2	20.5499	2	0	3	1	1	2	1	1	2	0	2	3	3	3	3	1	2	0	1	0
711	21	0	1	0	3	2	20.4382	2	0	3	1	2	0	3	1	1	1	0	1	1	1	3	3	3	2	1	1
712	24	1	1	0	5		19.5918	2	0	4	1	1	1	1	0	3	1	1	3	3	3	3	3	3	3	3	0
713	21	1	1	0	3	2	17.3611	1	0	3	1	0	0	0	0	1	1	1	0	3	3	3	3	3	1	3	1
714	21	0	1	0	3	2	17.5926	1	0	3	1	1	1	1	1	2	2	1	0	2	2	2	2	2	2	2	0
715	22	1	1	0	3	2	21.6041	2	0	4	1	0	2	1	1	2	1	3	3	3	2	2	3	2	1	2	1
716	22	1	1	0	3	2	21.6128	2	0	3	1	2	2	2	2	2	2	2	1	2	2	2	2	2	1	2	0
717	20	1	1	0	3	2	23.8751	2	0	3	1	1	3	3	3	3	0	3	3	3	3	3	2	3	2	3	1
719	22	0	1	0	3	2	23.4236	2	0	3	1	1	1	1	1	3	0	0	3	3	2	2	2	1	2	1	0
720	22	1	1	0	3	3	19.1512	2	0	2	0	2	1	1	1	1	0	3	1	3	2	2	1	0	2	2	1
721	25	0	1	0	3	2	28.4005	3	1	4	1	2	1	3	0	3	0	3	0	3	2	2	1	3	2	2	1
722	25	0	1	0	3	2	26.5888	3	1	3	1	0	0	0	0	0	0	0	0	0	0	0	0	0	0	0	1
723	23	0	1	0	3	1	21.847	2	0	4	1	1	1	2	0	0	0	1	2	3	2	2	3	1	3	1	1
724	21	0	1	0	3	2	16.3721	1	0	3	1	0	0	1	0	1	0	2	3	2	2	2	1	2	3	2	0
725	22	0	1	0	3	2	24.6914	2	0	4	1	1	1	2	1	0	1	2	3	3	2	2	1	2	2	2	1
726	20	1	1	0	3	4	23.1834	2	0	2	0	1	1	1	0	0	0	0	3	3	3	3	2	1	1	1	1
727	23	1	1	0	3	2	21.4533	2	0	4	1	1	2	1	2	2	2	1	3	3	2	2	2	1	3	2	1
728	22	1	1	0	3	2	25.0995	3	1	3	1	0	1	2	1	2	1	2	0	3	2	3	3	0	0	0	0
729	21	1	1	0	3	2	24.1672	2	0	3	1	0	1	1	0	0	2	0	3	3	2	1	2	1	0	1	0
730	25	0	1	0	3	3	28.9461	3	1	3	1	0	0	0	0	0	1	0	3	3	3	3	2	3	2	3	0
731	23	0	1	0	5	3	24.539	2	0	3	1	2	2	1	0	1	2	1	2	3	3	2	2	3	2	2	0
732	36	0	1	0	5	3	17.6471	1	0			1	2	2	2	1	2	3	3	3	0	0	0	0	0	2	0
733	24	0	1	0	4		21.3859	2	0	4	1	1	0	2	2	3	1	2	0	2	3	2	3	3	2	2	1
734	27	0	1	0	4	3	24.0317	2	0	3	1	0	0	1	3	3	3	3	1	3	1	3	1	3	2	2	0
735	28	1	1	0	5	1	27.6888	3	1	3	1	1	0	1	2	2	2	2	2	2	2	2	2	2	2	2	1
736	22	1	1	0	4	2	23.8754	2	0	3	1	2	3	1	3	3	2	0	2	1	1	2	1	3	0	0	1
737	21	1	1	0	4	2	19.5854	2	0			0	0	0	1	2	0	1	2	3	3	2	1	2	1	1	1
738	20	1	1	0	1	3	32.8306	4	1	2	0	0	1	0	0	0	1	2	0	3	1	0	3	3	2	3	1
739	18	1	1	0	1	3	23.6614	2	0	3	1	1	0	0	0	1	1	2	1	3	2	1	1	3	2	1	0
740	18	1	1	0	1	3	29.7442	3	1	3	1	2	1	3	0	0	0	0	1	3	3	1	0	3	2	2	1
741	18	0	1	0	1	3	26.4721	3	1	4	1	1	1	1	0	1	2	2	2	3	2	1	2	2	2	2	0
742	21	0	1	0	1	1	26.449	3	1	3	1	0	0	1	1	0	1	0	0	2	2	0	0	3	2	1	0
743	19	0	1	0	1	3	26.9896	3	1	3	1	1	2	1	0	0	2	0	0	0	2	1	2	3	1	1	0
744	20	0	1	0	1	3	19.487	2	0	3	1	1	1	1	0	2	3	0	2	3	2	1	1	2	2	2	0
745	23	1	1	0	1		25.711	3	1	3	1	0	0	0	0	0	0	0	3	3	1	1	0	1	0	0	1
746	19	1	1	0	1	3	22.0581	2	0	3	1	1	0	2	1	2	1	1	3	3	3	2	2	1	1	1	0
747	20	1	1	0	1	3	20.061	2	0	4	1	1	2	1	0	0	0	1	0	2	2	1	1	3	2	2	0
748	18	0	1	0	1	3	20.7476	2	0	3	1	1	0	1	0	0	1	0	0	3	3	0	1	3	3	1	1
749	18	0	1	0	1	3	20.7612	2	0	3	1	0	0	0	0	2	3	0	2	0	1	2	1	3	2	0	1
750	19	0	1	0	1	3	21.2245	2	0	3	1	1	0	1	0	2	2	0	0	2	2	1	0	3	2	2	0
751	20	1	2	0	2	4	26.3702	3	1	4	1	0	1	2	0	2	0	3	3	3	1	2	0	0	0	1	1
752	19	1	2	0	2	4	26.4463	3	1	3	1	0	1	0	0	0	0	0	2	3	3	0	2	3	2	3	0
753	19	0	2	0	3	4	20.4152	2	0	4	1	2	0	1	3	1	2	0	1	2	2	3	2	3	1	1	0
754	20	0	2	0	2	4	20.0617	2	0	3	1	0	0	2	3	3	3	1	3	3	1	1	1	2	2	1	0
755	20	1	2	0	2	4	26.7229	3	1	3	1	2	2	1	2	3	1	0	2	3	2	2	2	3	2	2	0
756	19	1	2	0	2	4	21.0498	2	0	3	1	1	0	3	0	0	1	1	2	3	2	1	1	2	1	1	1
757	22	1	2	0	2	4	20.6905	2	0	3	1	1	2	0	0	0	0	0	3	2	3	2	2	1	3	1	1
758	20	1	1	0	1	3				2	0	1	0	3	0	0	0	1	0	3	3	0	0	3	3	3	1
761	20	1	1	0	1	3	17.8744	1	0	3	1	2	1	1	0	1	0	0	1	3	3	3	2	3	0	2	0
762	22	1	1	0	1	3	19.1854	2	0	2	0	1	0	1	0	1	1	0	3	3	2	2	0	3	0	1	1
763	21	1	1	0	1	3	23.0112	2	0	3	1	1	0	0	0	0	0	0	0	0	3	0	1	0	2	2	1
764	24	0	1	0	5	3	28.4055	3	1	4	1	3	1	3	3	3	3	0	0	1	3	3	3	3	3	3	1
765		1	1	0	2	3	19.1001	2	0	2	0	0	1	0	1	3	1	0	3	3	3	3	3	0	2	0	1
766	25	1	1	0	1	3	27.852	3	1	3	1	0	1	2	0	0	0	0	0	3	3	3	2	3	2	3	1
767	18	1	1	0	1	3	21.1927	2	0			3	1	3	3	3	3	2	0	3	3	3	1	2	0	3	1
768	19	1	1	0	1	3	24.0882	2	0	3	1	1	1	1	2	2	1	3	1	3	3	3	3	2	3	3	1
769	20	1	1	0	1	3	21.6311	2	0	2	0	1	0	2	3	3	3	2	3	3	3	3	1	3	2	2	0
770	18	1	1	0	1	3	21.717	2	0	4	1	2	0	1	2	0	1	3	0	3	3	2	0	3	0	3	1
771	24	1	1	0	1	3	30.1103	4	1	3	1	2	0	2	2	2	3	3	0	3	3	3	2	3	3	3	1
772	18	1	1	0	1	3	26.4463	3	1	3	1	0	1	0	0	0	0	0	0	1	2	1	0	3	2	1	1
773	19	1	1	0	1	3	21.7193	2	0	3	1	0	2	1	2	0	0	1	0	0	1	2	1	1	0	1	0
774	18	1	1	0	1	3	22.1893	2	0	3	1	3	2	3	3	3	2	1	3	3	1	1	1	1	2	1	1
775	18	1	1	0	1		20.5499	2	0	3	1	1	1	1	1	1	3	0	3	3	3	3	3	3	2	2	1
776	18	1	1	0	1	3	27.2817	3	1	2	0	0	2	0	1	1	1	0	0	2	3	1	1	2	0	1	1
777	22	1	1	0	1	3	23.0112	2	0	3	1	2	1	1	0	1	1	2	0	0	3	1	1	1	1	0	1
778	25	1	1	0	1	3	18.3655	1	0			1	2	2	1	2	2	1	0	3	1	1	1	1	1	1	1
779	18	1	1	0	1	3	23.4375	2	0	3	1	0	1	1	0	0	3	3	0	3	3	3	2	3	1	0	0
780	26	1	1	0	1	3	26.079	3	1	3	1	1	1	1	0	0	0	0	1	3	3	1	1	0	0	0	0
781	19	1	1	0	1	3	22.7732	2	0	3	1	1	1	1	1	1	1	0	3	1	2	2	2	2	2	2	0
782	27	0	1	0	1	3	27.7647	3	1	2	0	2	2	2	3	3	3	2	3	2	3	3	3	3	3	3	1
783	19	1	1	0	1	3	17.0088	1	0	3	1	1	0	1	0	0	0	0	0	2	0	3	2	2	2	1	0
784	19	1	1	0	1	3	23.5304	2	0			3	1	2	2	2	2	0	1	3	3	1	3	3	2	2	1
785	39	1	1	0	1	3	36.7578	4	1	2	0	1	2	3	1	1	1	1	3	3	3	2	1	1	3	1	0
786	23	1	1	0	1	3	22.2656	2	0	3	1	1	1	3	0	0	1	3	3	3	2	2	1	0	1	1	1
787	23	0	1	0	2	3	28.0816	3	1	4	1	0	2	1	0	3	0	1	0	2	2	2	2	3	3	1	0
788	19	1	1	0	1	3	20.5761	2	0	2	0	0	0	0	0	0	0	1	0	0	1	0	0	0	0	1	0
790	22	0	1	0	4	3	29.3031	3	1	3	1	0	0	0	0	0	0	1	0	3	3	3	3	3	3	3	0
791	21	0	1	0	1	3	24.623	2	0	3	1	1	3	2	1	0	2	0	3	3	2	2	1	3	1	1	0
792	18	1	1	0	1	3	24.974	2	0	3	1	0	2	0	0	0	1	3	3	3	2	3	1	1	0	0	1
793	22	1	1	0	1	3	23.1473	2	0	3	1	1	2	3	0	0	0	3	3	3	3	2	2	2	2	1	0
794	23	0	1	0		3	26.1286	3	1	3	1	1	1	1	1	2	3	2	0	2	1	1	0	3	3	2	0
795	19	0	1	0	2	3	23.1206	2	0	3	1	2	2	2	3	3	1	2	3	3	2	2	0	0	2	1	1
796	21	0	1	0	2	4	23.1481	2	0	3	1	0	0	0	0	0	0	0	1	3	2	1	0	2	3	1	0
797	24	1	1	0	1	3	19.1406	2	0	3	1	1	1	0	0	0	0	1	0	1	2	2	1	1	1	0	0
798	19	1	1	0	2	3	23.2335	2	0	3	1	1	2	2	1	1	3	1	3	3	3	3	3	3	1	3	0
799	26	0	1	0	4	3	24.3072	2	0	3	1	3	1	1	0	0	1	0	0	1	3	0	0	0	3	1	0
800	24	0	1	0	5	3	24.2123	2	0	4	1	2	1	2	2	2	2	2	2	2	2	2	2	2	2	1	0
801	25	0	1	0	5	3	21.9713	2	0	3	1	0	0	0	0	0	0	0	3	3	0	0	0	0	3	0	0
802	19	0	1	0	2	3	21.1327	2	0	4	1	1	2	3	3	3	1	0	0	3	3	2	1	2	3	2	1
803	18	1	1	0	1	2	16.0037	1	0	4	1	1	1	3	1	2	3	2	3	3	3	3	3	3	3	3	1
804	18	1	1	0	1	2	22.2063	2	0	3	1	0	1	3	0	0	3	0	0	3	3	1	1	3	2	2	1
805	21	1	1	0	4	3	20.7967	2	0	2	0	0	2	1	0	0	3	1	1	3	2	2	2	1	1	1	1
806	21	1	1	0	4	3	24.6548	2	0	3	1	1	1	0	0	0	0	0	0	3	2	1	1	0	1	0	0
807	28	1	1	0	1	2	28.3987	3	1	3	1	1	0	0	0	0	0	0	2	1	2	1	1	0	1	0	1
808	18	1	1	0	1	2	23.5294	2	0	4	1	1	0	2	1	0	0	1	3	1	3	0	3	3	2	2	0
809	19	1	1	0	1	2	25.7117	3	1	2	0	1	1	3	1	0	1	0	0	2	3	2	2	3	2	2	0
810	25	0	1	0	2	3	24.5675	2	0	3	1	3	3	3	3	3	3	2	1	1	3	3	3	2	2	1	0
811	25	0	1	0	4	3	22.3094	2	0	3	1	3	0	1	1	2	3	0	0	0	3	3	1	3	1	2	1
812	34	0	1	0	2	3	26.881	3	1	3	1	0	1	1	3	1	1	0	2	1	3	2	3	2	2	2	0
813	19	0	1	0	2	3	28.0816	3	1			3	1	0	3	0	3	1	3	3	3	3	2	3	2	3	1
814	21	1	1	0	2	1	24.6097	2	0	3	1	2	3	3	3	1	3	2	3	3	2	1	2	2	2	1	0
815	21	1	1	0	2		16.937	1	0	3	1	0	0	0	1	0	0	0	3	3	2	2	1	3	1	1	1
816	19	1	1	0	1	3	26.1249	3	1	3	1	0	1	0	2	3	1	3	3	3	3	2	1	0	1	1	0
817	18	1	1	0	1	3	23.5666	2	0	3	1	2	2	2	3	3	3	3	3	3	2	3	3	1	1	2	0
818	18	1	1	0	1	3	19.8178	2	0	2	0	1	0	0	0	0	3	1	0	3	2	3	2	2	1	1	0
820	19	1	1	0	1	4	20.6612	2	0	4	1	1	1	1	0	1	1	1	0	3	3	3	1	0	1	2	1
821	18	1	1	0	1	4	29.3878	3	1	2	0	2	2	1	1	0	2	0	3	3	3	2	1	2	2	1	0
822	21	0	1	0	2	3	27.31	3	1	3	1	1	0	1	1	1	0	2	3	2	3	3	3	1	1	2	1
823	29	1	1	0	2	3	23.3887	2	0	3	1	3	3	1	0	0	0	0	3	3	3	1	0	3	1	1	0
824	21	1	1	0	5	1	34.4148	4	1	3	1	1	0	2	1	2	3	3	0	1	3	3	2	3	2	0	1
825	20	0	1	0	2	1	24.4193	2	0	3	1	0	2	0	3	3	3	0	2	1	1	2	1	1	1	1	0
826	23	0	1	0	2		25.7959	3	1	4	1	2	2	2	3	3	0	1	1	2	2	2	2	2	1	2	1
827	19	1	1	0	2	3	19.1111	2	0	3	1	2	2	2	0	2	2	1	3	3	2	1	1	2	0	1	0
828	20	0	1	0	2	3	23.7954	2	0	3	1	1	2	3	0	0	0	0	0	3	3	1	3	3	2	1	0
829	18	1	1	0	1	2	23.1405	2	0	2	0	1	0	1	0	0	0	0	3	3	2	2	1	1	0	0	1
830	21	1	1	0	1	2	17.9151	1	0	2	0	0	0	2	1	3	3	3	3	3	3	3	2	3	2	2	0
831	21	1	1	0	4	3						0	0	0	0	0	0	0	3	3	3	2	1	3	3	2	1
832	18	1	1	0	1	2	20.0692	2	0	4	1	0	0	3	0	0	0	0	0	3	3	3	3	3	1	3	0
833	22	1	1	0	1	2	24.1588	2	0	2	0	2	1	1	2	2	1	2	3	1	2	2	2	2	0	1	1
834	18	1	1	0	1	2	20.5457	2	0	4	1	0	0	1	0	0	0	0	3	3	2	1	1	3	1	3	0
835	24	1	1	0	1	2	19.4771	2	0	4	1	1	0	0	0	0	2	1	1	3	3	2	1	2	2	1	0
836	18	1	1	0	1	2	18.3655	1	0	3	1	1	1	2	0	0	1	0	0	3	3	2	3	2	1	1	1
837	18	1	1	0	1	2	17.1875	1	0	4	1	1	3	3	1	0	2	2	3	3	3	3	3	3	2	2	0
838	18	1	1	0	1	2	18.5078	2	0	3	1	2	3	2	3	3	3	2	3	3	3	2	1	2	2	2	1
839	23	1	1	0	1	2	18.132	1	0	3	1	1	2	1	3	3	2	1	2	3	0	1	1	0	1	0	0
840	18	1	1	0	1	2	20.5693	2	0	3	1	0	0	3	1	0	3	1	3	3	3	3	2	2	2	2	0
841	20	1	1	0	1	2	22.5896	2	0	4	1	1	1	0	0	1	0	2	0	2	2	2	2	2	1	1	0
842	19	1	2	0	2	4	20.8117	2	0	4	1	1	3	1	0	3	0	2	3	3	3	3	2	3	2	1	1
843	25	0	2	0	4	4	19.9446	2	0	3	1	2	0	1	3	3	3	0	1	3	2	3	1	3	1	2	0
844	20	1	2	0	2	4	22.2063	2	0	2	0	1	1	0	0	2	0	0	3	3	2	1	0	0	0	0	0
845	24	0	2	0	2	4	24.5693	2	0	2	0	0	0	1	3	1	3	0	3	3	3	2	1	3	3	1	0
846	19	0	2	0	2	4	22.2222	2	0	3	1	2	0	1	2	2	0	0	1	0	0	0	0	3	3	3	1
847	24	1	1	0	2		23.6244	2	0	3	1	1	2	0	2	2	3	1	3	3	3	1	2	2	2	3	0
848	20	0	1	0	2	3	25.9455	3	1	3	1	1	0	1	2	1	3	0	2	3	1	0	2	2	2	1	0
849	26	0	1	0	4	3	25.2595	3	1	3	1	2	1	0	0	0	0	0	3	3	2	2	0	3	1	3	1
850	19	1	1	0	2	3	32.0291	4	1	2	0	0	0	0	2	2	2	0	3	3	1	1	0	1	1	1	1
851	26	1	1	0	4	2	21.7555	2	0	3	1	1	0	3	0	1	3	3	3	3	3	0	2	3	2	3	0
852	21	1	1	0	4	2	17.898	1	0	3	1	1	0	2	0	0	1	2	0	3	3	3	3	1	1	2	1
853	21	1	1	0	4	2	22.2063	2	0	2	0	1	2	1	2	2	3	1	1	3	1	3	3	3	3	3	1
854	21	1	1	0	4	2	18.8189	2	0	3	1	1	2	1	0	0	0	2	0	3	3	2	2	2	2	2	1
856	20	1	1	0	1	3	29.7056	3	1	3	1	1	1	0	1	1	3	0	0	3	2	1	1	1	2	0	1
857	21	1	3	1	4	4	21.7784	2	0	3	1	0	1	0	0	3	0	2	3	3	3	3	1	3	2	1	0
858	19	0	1	0	2	2	19.9184	2	0	4	1	0	0	0	0	1	3	1	1	3	2	1	1	3	1	2	1
859	19	0	1	0	2	2	21.7365	2	0	4	1	0	0	1	0	1	2	1	2	3	3	3	2	3	0	3	0
860	18	1	1	0	1	1	26.3465	3	1	4	1	0	1	0	0	0	1	0	0	2	1	1	1	1	1	1	0
861	21	0	1	0	2	2	23.7228	2	0	4	1	2	1	3	2	2	2	3	3	3	3	3	3	3	3	3	1
862	19	0	2	0	2	4	24.9307	2	0	4	1	0	1	1	1	3	3	0	0	3	3	3	1	3	1	3	1
863	19	0	2	0	2	4	30.7942	4	1	3	1	1	0	0	0	0	0	2	2	3	3	2	3	2	2	1	1
864	19	0	1	0	2	3	45.2694	4	1	2	0	0	0	2	0	1	1	1	0	3	3	2	2	3	2	2	0
865	22	1	1	0	3	4	20.5688	2	0	3	1	3	0	3	3	3	3	3	3	3	1	1	1	0	0	1	1
866	21	0	1	0	2	1	27.7551	3	1	3	1	1	2	3	2	1	2	0	0	3	3	3	3	3	3	3	0
867	21	0	1	0	2	2	23.9395	2	0	3	1	0	1	0	0	0	1	0	3	3	2	2	1	1	2	2	1
868	19	1	1	0	2	2	19.8178	2	0	2	0	1	1	2	0	0	2	1	3	3	2	2	2	2	2	2	0
869	21	1	1	0	2	2	17.8465	1	0	3	1	0	1	2	0	0	0	1	3	3	2	1	0	1	1	1	1
870	21	0	1	0	3	4	22.3094	2	0	4	1	0	1	0	0	0	0	0	3	3	1	2	0	3	1	0	1
871	19	1	1	0	2	2	20.7031	2	0	3	1	2	1	3	0	1	2	3	3	3	3	2	2	2	2	2	1
872	19	1	1	0	2	2	18.4425	1	0	3	1	0	1	3	1	1	3	1	2	3	3	2	2	3	1	2	0
873	18	0	1	0	2	4	22.8571	2	0	3	1	1	1	1	3	1	3	0	3	3	0	1	0	3	2	1	1
874	19	0	1	0	2	2	23.6614	2	0	4	1	3	1	1	0	3	0	3	3	3	3	1	1	1	1	2	1
875	19	0	1	0	2	2	21.1927	2	0	3	1	2	2	1	0	3	3	3	3	3	3	3	3	3	3	3	1
876	20	0	1	0	2	3	23.3887	2	0	3	1	0	1	0	0	0	0	0	2	1	3	3	3	3	1	2	1
877	20	0	2	0	2	4	23.5036	2	0	2	0	0	2	3	1	1	1	0	1	2	1	1	0	1	0	1	0
878	24	0	2	0	5	4	35.5341	4	1	4	1	1	1	0	1	2	1	0	3	3	0	0	0	3	2	2	1
879	22	1	2	0	5	4	26.3656	3	1	4	1	1	2	1	1	1	2	3	3	3	3	2	2	2	1	2	1
880	20	1	2	0	2	4	19.563	2	0	4	1	1	1	0	0	2	2	1	3	3	2	1	1	2	2	1	0
881	20	0	2	0	2	4	22.8931	2	0	2	0	3	1	2	0	2	3	0	2	3	2	2	3	3	0	2	0
882	19	1	2	0	2	4	18.8189	2	0	3	1	0	1	1	0	0	1	2	3	3	3	1	0	1	0	1	0
883	21	1	2	0	2	4	26.6667	3	1	3	1	1	0	0	0	0	3	0	3	3	3	1	1	3	3	1	0
884	21	1	2	0	2	4	26.0375	3	1	3	1	1	3	1	1	3	0	3	3	2	2	3	1	0	2	1	1
886	24	0	1	0	4	2	24.0741	2	0	4	1	2	2	2	3	3	2	0	3	3	1	1	0	1	3	1	1
887	18	0	2	0	1	4	23.5479	2	0	3	1	1	0	3	3	3	3	0	2	3	3	3	3	3	2	1	0
888	21	1	3	1	3	4	19.3821	2	0	3	1	1	1	2	0	0	0	3	3	3	2	1	2	1	1	1	1
889	20	1	1	0	3	2	19.4674	2	0	3	1	1	0	1	0	0	3	1	3	3	3	3	3	3	3	2	0
890	19	0	3	1	2	4	25.4694	3	1	3	1	2	1	0	0	2	2	1	2	3	3	2	1	2	1	1	1
891	18	1	2	0	1	4	20.2449	2	0	4	1	1	1	3	1	1	0	0	0	3	3	3	1	2	0	1	1
892	18	1	2	0	1	4	21.7993	2	0	3	1	0	1	0	0	3	3	3	2	3	3	3	3	3	3	3	1
893	19	1	2	0	1	4	24.4646	2	0	3	1	2	1	1	0	0	2	3	3	3	3	2	0	1	1	0	1
894	20	1	2	0	1	4	22.0243	2	0	3	1	0	0	0	1	0	1	0	3	2	2	1	0	0	2	0	1
895	19	1	2	0	1	4	27.5482	3	1	4	1	0	1	0	0	0	3	2	0	3	3	3	2	3	3	2	1
896	21	1	3	1	4	4	21.5451	2	0	3	1	0	1	1	0	0	0	1	3	3	1	1	1	1	1	0	0
897	25	1	3	1	5	3	27.0993	3	1	3	1	2	2	0	0	0	1	3	3	3	3	3	3	3	1	1	0
898	20	1	1	0	3	3	18.7305	2	0	3	1	1	2	1	1	0	3	1	3	3	3	3	2	2	1	1	0
900	18	1	2	0	1	4	19.8347	2	0	3	1	1	0	2	1	1	2	0	2	3	1	1	1	1	1	0	0
901	18	1	2	0	1	4	17.9931	1	0	3	1	1	1	2	2	2	1	0	3	3	3	3	2	3	1	3	0
902	20	1	2	0	1	4	32.2708	4	1	3	1	2	0	2	0	0	1	1	3	3	3	2	2	1	1	2	1
903	24	1	2	0	1	4	28.8415	3	1	2	0	0	2	0	3	3	3	0	3	3	2	0	0	0	0	0	0
904	22	0	3	1	4	4	28.7037	3	1	2	0	0	1	0	2	1	3	3	3	3	2	2	2	1	2	1	1
905	22	0	3	1	5	3	28.7347	3	1	3	1	1	2	1	0	1	1	2	1	2	2	3	3	2	2	2	0
906	21	0	2	0	1	4	25.5354	3	1	4	1	1	2	0	3	3	1	0	0	3	2	2	2	1	1	2	0
907	18	1	1	0	1	4	23.7387	2	0	3	1	0	1	0	0	0	2	0	0	0	2	1	2	1	0	0	0
908	20	1	3	1	3	4	27.0552	3	1	2	0	2	1	1	0	0	0	3	1	3	3	1	2	1	1	2	1
909	18	1	1	0	1	4	26.6436	3	1	2	0	1	0	1	0	0	0	0	3	3	3	3	0	3	2	0	1
910	23	1	3	1	4	4	25.763	3	1	3	1	1	0	1	0	3	2	0	3	3	3	0	1	0	3	1	0
911	18	1	1	0	1	4	16.9563	1	0	3	1	1	1	1	1	3	2	0	0	3	3	3	2	3	0	3	0
912	18	1	1	0	1	4	25.4767	3	1	3	1	1	1	1	0	1	0	0	3	1	3	1	1	2	0	2	1
913	22	1	3	1	3	3	27.3437	3	1	3	1	1	1	2	2	3	3	0	2	3	3	3	2	2	1	2	0
914	18	1	1	0	1	4	24.2215	2	0	2	0	1	1	0	1	2	3	2	3	3	3	3	1	3	1	1	0
915	19	1	3	1	2	3	17.8506	1	0	4	1	2	0	1	0	0	0	0	2	3	1	2	2	3	2	2	0
916	35	0	3	1	5	3				2	0	1	2	1	2	3	3	2	3	3	2	2	1	2	3	1	1
918	22	0	3	1	2	3	26.2346	3	1	4	1	2	1	2	1	1	1	2	1	1	2	2	1	3	1	2	1
919	21	1	3	1	2	3	22.5827	2	0	3	1	0	1	0	1	1	0	1	3	3	2	1	0	2	1	2	1
920	20	1	3	1	2	3	22.9481	2	0	3	1	2	2	0	1	1	0	2	0	3	3	1	1	3	1	2	0
922	21	1	3	1	2	3	23.1473	2	0	3	1	0	1	1	0	3	1	1	0	3	1	1	3	2	1	2	1
924	19	1	3	1	2	3	17.2635	1	0	3	1	1	0	0	0	0	1	0	3	3	2	1	1	1	1	1	1
925	20	1	3	1	2	3	32.7449	4	1	2	0	1	0	2	0	0	0	2	3	3	3	1	1	2	2	1	0
926	26	1	3	1	2	3	25.711	3	1	2	0	1	0	1	0	0	1	1	2	3	1	0	1	1	0	1	1
927	20	1	3	1	2	3	31.975	4	1	2	0	1	2	2	1	2	3	3	1	3	3	3	2	3	1	1	1
929	22	1	1	0	4	2	21.6311	2	0	4	1	2	2	2	2	3	1	3	3	3	3	3	1	3	0	1	1
930	18	1	2	0	1	4	26.6193	3	1	3	1	1	2	1	1	0	0	0	1	2	3	2	2	2	1	1	0
931	18	1	2	0	1	4	26.0262	3	1	2	0	0	0	0	0	0	1	0	3	2	1	1	0	3	0	0	1
932	22	1	3	1	5	4	25.3444	3	1	3	1	0	2	2	1	1	2	1	3	3	3	1	0	0	0	0	1
933	23	0	1	0	2	2	23.1834	2	0	4	1	2	2	3	3	3	1	3	2	3	3	3	2	2	2	2	0
934	23	1	1	0	2	2	25.6489	3	1	4	1	0	1	0	0	0	0	2	2	3	3	3	3	3	2	3	0
935	20	1	1	0	2	2	20.4382	2	0	4	1	0	1	0	0	0	1	3	2	0	2	2	1	3	2	1	0
937	19	0	1	0	2	2	20.5499	2	0	2	0	1	1	2	1	1	2	0	3	2	2	2	2	2	2	2	1
938	24	0	1	0	2	2	19.8352	2	0	2	0	2	1	3	3	2	3	0	3	2	3	2	3	3	2	2	1
939	19	1	1	0	2	1	26.2188	3	1	3	1	1	1	1	1	1	2	1	3	3	2	3	2	2	1	0	1
940	19	0	1	0	2	2	23.1983	2	0	3	1	1	1	0	0	0	0	0	0	0	2	1	3	3	1	1	1
941	22	1	1	0		4	22.2656	2	0			2	2	3	1	3	1	3	3	3	3	3	3	1	1	3	0
942	19	1	1	0	2	1				3	1	0	0	1	1	1	0	0	2	3	2	2	1	0	2	2	1
943	20	1	1	0	2	1	24.5578	2	0	3	1	0	2	2	0	2	0	1	2	3	3	1	1	3	0	1	1
944	24	0	1	0	5	4	23.1481	2	0	4	1	0	0	1	3	3	2	0	0	0	3	3	3	3	0	3	1
945	29	0	1	0	2	3	23.3887	2	0	3	1	1	0	2	3	3	2	2	1	3	3	3	3	3	3	3	1
946	20	1	1	0	2	2	22.6562	2	0	4	1	0	1	1	3	3	1	2	3	3	3	2	0	3	1	1	1
948	20	1	1	0	2	2	18.7305	2	0	3	1	0	1	1	0	0	0	0	2	3	3	2	2	3	1	2	0
949	21	0	1	0	2	2	22.4082	2	0	3	1	0	1	2	0	2	3	1	2	3	3	2	1	3	2	1	1
950	20	0	1	0	2	4	26.9896	3	1	3	1	2	2	2	2	3	1	0	1	3	2	3	3	0	2	1	0
951	19	1	1	0	2	2	21.5645	2	0	3	1	2	0	1	0	1	0	0	1	3	3	2	2	2	1	3	0
952	19	0	1	0	2	2	18.4157	1	0	4	1	3	0	1	0	1	2	0	0	3	2	2	1	2	2	2	1
953	19	1	1	0	2	2	20.7612	2	0	3	1	3	1	2	0	1	3	1	1	3	3	2	2	3	1	1	1
954	20	1	1	0	2	2	31.0979	4	1	3	1	1	2	1	0	1	1	1	0	1	1	1	1	3	1	1	1
955	19	0	1	0	2	2	23.255	2	0	3	1	0	1	0	0	2	1	2	3	3	2	3	2	3	2	3	0
956	20	0	1	0	2	2	22.4088	2	0	4	1	2	1	2	1	3	1	1	1	2	2	2	2	2	1	2	0
957	19	0	1	0	2	2	21.1616	2	0	3	1	1	1	1	2	3	3	3	1	3	3	2	2	3	3	3	1
958	20	0	1	0	2	4	29.0253	3	1	3	1	0	1	0	0	0	3	1	1	3	3	2	0	2	3	1	0
959	24	0	1	0	2	2	28.075	3	1	3	1	0	2	1	2	3	1	0	2	2	2	2	2	3	2	2	0
960	19	0	1	0	2	2	21.8776	2	0	3	1	0	0	2	1	0	1	0	0	3	3	3	3	3	3	3	1
961	20	0	1	0	2	2	23.3887	2	0	4	1	1	1	0	2	3	1	2	0	1	3	3	3	3	2	3	0
962	19	1	1	0	2	4	22.6409	2	0	2	0	1	0	3	0	0	0	3	0	3	3	3	3	3	2	0	0
963	23	1	1	0	2	4	17.9982	1	0	4	1	1	1	1	0	0	0	0	1	2	1	1	0	3	2	1	1
964	19	1	1	0	2	4	24.3418	2	0	3	1	1	1	0	1	2	0	0	0	3	3	1	1	2	1	1	0
965	34	1	1	0	3	2	21.83	2	0	3	1	1	2	1	0	0	1	2	3	3	2	1	1	0	2	1	0
967	21	0	1	0	5	1	23.1481	2	0	3	1	0	0	1	0	2	1	1	0	3	3	3	2	3	3	2	0
968	19	1	1	0	2	4	27.5802	3	1	3	1	0	1	1	0	0	1	0	0	3	3	3	3	3	3	3	0
969	19	0	1	0	2	2	24.2215	2	0	4	1	1	3	2	0	1	0	1	1	3	3	2	0	3	2	3	1
970	21	0	1	0	4	2	29.0367	3	1	4	1	0	1	3	0	2	1	2	0	2	2	1	2	1	1	1	0
971	20	0	1	0	2	3	23.4131	2	0	3	1	0	0	0	0	0	3	0	0	3	3	3	1	0	0	0	0
972	21	1	1	0	3	2	22.2656	2	0	3	1	2	1	3	3	3	3	3	1	1	2	3	3	2	3	2	1
973	20	0	1	0	2	3	24.0741	2	0	3	1	3	1	3	3	3	3	0	0	3	1	3	0	3	3	0	0
974	20	0	1	0	2	3	26.0617	3	1	3	1	0	1	3	0	2	2	2	3	3	3	3	3	3	3	2	0
975	27	0	1	0	2		32.8731	4	1	3	1	1	1	1	0	0	0	1	3	3	1	1	0	0	1	0	0
976	25	1	1	0	2	3	18.2183	1	0	3	1	2	2	3	2	2	0	3	3	3	3	1	1	0	1	0	0
977	21	1	1	0	3	2	23.5102	2	0	3	1	1	0	0	0	0	0	1	1	2	3	1	1	3	3	1	1
978	29	1	1	0	3	2	33.0579	4	1	3	1	2	1	1	1	0	0	3	0	3	3	1	0	3	1	1	1
979	19	0	2	0	1	4	18.5132	2	0			3	3	1	0	0	1	3	3	3	1	1	1	3	1	2	0
980	19	1	2	0	1	4	27.1416	3	1			0	1	1	1	0	2	0	1	0	2	0	2	2	2	2	1
982	19	1	2	0	1	4	20.0777	2	0	3	1	2	1	2	0	0	3	2	3	3	2	2	3	3	2	1	1
983	18	1	2	0	1	4	22.2656	2	0	3	1	3	2	1	3	3	3	2	3	3	3	3	1	1	1	1	0
984	19	0	2	0	1	4	22.6474	2	0	4	1	2	2	2	3	3	1	1	2	2	2	2	1	3	2	2	1
985	19	0	2	0	1	4	22.3954	2	0	4	1	0	2	1	1	1	2	0	2	3	1	3	2	2	2	0	0
986	18	0	2	0	1	4	21.9138	2	0	2	0	1	2	1	1	1	1	0	1	3	2	3	2	2	2	2	1
987	20	0	1	0	2		25.1278	3	1	3	1	0	1	2	2	3	1	1	2	3	2	3	2	2	1	2	1
988	22	0	1	0	2	3	21.6066	2	0	4	1	0	0	0	3	3	3	0	0	2	3	3	2	3	2	0	1
989	19	0	1	0	2	3	25.3815	3	1	3	1	1	1	1	2	3	1	1	3	3	2	2	2	2	2	1	1
990	20	0	1	0	2	3	25.1063	3	1	3	1	0	2	2	0	2	2	3	0	3	3	3	3	3	1	3	1
991	20	1	1	0	2	3	20.5499	2	0	3	1	0	1	0	0	1	2	0	3	2	1	2	1	0	1	1	0
992	25	0	1	0	2	3	25.7122	3	1	4	1	1	3	2	2	2	3	1	3	3	2	0	0	1	1	2	0
993	22	0	1	0	2		30.7599	4	1	2	0	1	1	1	2	2	0	2	0	3	3	0	0	3	2	2	1
994	31	0	1	0	2	3	21.3669	2	0	3	1	1	1	2	0	0	0	2	3	3	1	2	1	1	0	1	1
995	19	1	1	0	2	3	16.7311	1	0	2	0	2	1	0	0	1	0	0	3	3	2	1	1	2	0	1	0
996	20	1	1	0	2	4				3	1	1	3	2	0	0	0	0	1	3	3	3	3	3	1	0	0
997	22	0	1	0	2	3	22.6347	2	0	3	1	2	2	3	0	0	0	3	0	1	3	1	1	0	2	1	0
998	29	0	1	0	2	3	24.8163	2	0	3	1	1	1	2	3	3	3	2	3	3	3	2	1	3	1	3	0
999	19	1	1	0	2	3	19.7232	2	0	4	1	0	0	0	0	0	1	2	3	3	2	2	1	1	1	1	1
1000	18	1	1	0	2	3	22.9591	2	0	3	1	1	1	1	2	3	1	2	2	3	3	3	3	1	1	1	1
1001	19	1	1	0	2	3	23.8087	2	0	2	0	1	2	0	0	2	3	0	3	3	0	0	0	0	1	0	1
1002	21	1	1	0	2	3	25.2994	3	1	4	1	1	2	3	1	1	1	0	1	3	3	2	1	3	2	1	1
1003	21	1	1	0	2	3	20.5693	2	0			1	2	1	0	2	0	0	0	3	2	1	1	1	2	2	0
1004	20	0	1	0	2	2	22.8774	2	0	3	1	1	1	0	3	3	1	3	1	3	3	2	2	3	0	3	0
1005	21	0	1	0	2	2	22.7147	2	0	3	1	1	1	0	0	0	2	0	3	1	3	0	0	0	0	0	0
1006	20	0	1	0	2	2	22.2826	2	0	3	1	0	2	1	1	3	2	2	3	3	2	3	2	3	2	3	0
1007	21	1	1	0	2	2	20.9573	2	0	3	1	2	1	2	1	3	1	1	1	3	2	1	2	3	3	2	0
1008	20	1	1	0	2	4	20.9371	2	0	3	1	1	1	2	0	0	0	1	3	3	3	3	2	2	0	1	0
1009	20	1	1	0	2	1	25.7812	3	1	4	1	1	1	2	0	1	3	0	3	3	3	2	1	1	1	1	0
1010	24	0	1	0	2	1	30.095	4	1	3	1	1	1	0	3	3	3	3	3	3	3	3	2	2	1	0	1
1011	26	0	1	0	2	1	21.0077	2	0	2	0	1	0	1	3	1	3	0	0	3	1	0	0	2	0	1	0
1012	19	1	1	0	2		17.6898	1	0	3	1	1	1	2	0	2	3	1	3	3	3	1	1	2	0	1	1
1013	18	1	1	0	2	1	24.4011	2	0	4	1	1	2	1	2	3	3	0	3	3	2	2	2	3	2	1	0
1014	20	1	1	0	2		27.2173	3	1	4	1	0	1	3	0	0	0	2	3	3	3	2	3	2	1	1	0
1015	19	1	1	0	2	1	18.902	2	0	4	1	1	0	1	0	0	2	0	3	3	3	1	1	1	2	1	1
1016	21	1	1	0	2		23.4375	2	0	3	1	1	2	1	2	2	2	0	3	3	3	3	2	2	1	1	1
1017	23	1	1	0	3	1	19.0039	2	0	3	1	0	1	0	0	0	1	2	3	3	2	0	0	2	0	0	0
1019	18	1	1	0	1	4	27.3437	3	1	3	1	1	1	1	0	1	0	1	3	3	3	2	1	1	1	1	0
1020	18	1	1	0	1	4	18.2066	1	0	3	1	0	1	2	0	0	2	1	3	3	2	2	1	0	0	2	0
1021	20	0	1	0	2	3	25.4694	3	1	3	1	1	3	3	3	3	1	0	2	2	2	2	3	3	2	1	0
1022	19	1	1	0	2	3	24.8163	2	0	2	0	0	1	1	1	1	2	2	3	1	3	1	2	3	1	1	0
1023	37	1	1	0	2	3	19.313	2	0	3	1	3	2	3	2	3	1	3	3	3	3	3	2	2	2	2	0
1024	23	1	1	0	2	3	29.5525	3	1	2	0	0	1	1	0	0	0	1	3	2	2	1	1	2	1	1	1
1025	19	1	1	0	2		23.3091	2	0	3	1	1	2	0	0	0	2	2	3	3	1	1	1	2	1	1	0
1026	22	1	1	0	2	3	28.7201	3	1			0	2	2	2	2	3	2	1	1	0	1	0	3	2	1	1
1027	20	1	1	0	2	3	21.875	2	0	3	1	1	2	1	0	0	2	2	3	3	3	2	1	1	2	1	1
1028	19	1	1	0	2	1	23.1911	2	0	2	0	0	1	1	0	3	0	0	3	0	2	2	2	1	3	0	0
1029	20	0	1	0	2	3	20.7612	2	0	3	1	0	0	0	0	0	1	0	3	0	3	3	0	1	2	2	0
1030	21	1	1	0	2	3	20.6193	2	0	3	1	0	0	2	0	0	1	0	0	3	3	3	1	2	0	2	1
1031	20	0	3	1	3	4	20.5714	2	0	3	1	2	0	1	1	3	2	2	3	3	3	3	1	3	1	2	0
1032	21	1	3	1	3	4	26.8386	3	1	2	0	2	2	3	3	3	0	1	3	3	2	1	1	1	0	0	1
1033	24	1	3	1	4	3	19.6506	2	0	3	1	0	1	3	0	1	1	2	1	3	2	1	1	2	2	2	1
1034	22	1	3	1	3	4	20.2395	2	0	3	1	1	2	3	0	0	0	3	3	3	2	1	1	2	1	0	1
1035	22	0	3	1	3	4	22.3094	2	0	3	1	2	1	3	2	3	2	1	3	3	2	2	2	3	1	3	0
1036	20	1	3	1	3	4	20.1733	2	0	3	1	1	1	0	0	0	1	0	3	2	2	1	0	2	1	2	1
1037	21	1	3	1	3	4	21.875	2	0	3	1	1	2	1	0	3	0	1	3	3	3	3	2	3	1	2	0
1038	22	1	3	1	3		36.5062	4	1	3	1	0	1	1	0	0	0	1	3	3	1	0	1	0	0	0	1
1039	20	0	3	1	3	4	29.3945	3	1	2	0	3	2	0	1	0	2	3	3	3	2	0	3	0	0	0	0
1040	25	1	3	1	3	4	29.7211	3	1	3	1	0	1	0	0	1	1	2	3	2	3	3	2	2	1	2	1
1041	20	1	1	0	1	3	28.3447	3	1	2	0	0	1	0	0	3	3	1	1	3	0	1	2	0	1	1	1
1042	20	1	3	1	3	4	23.7332	2	0	3	1	0	1	1	0	0	0	2	3	3	3	2	2	1	1	1	0
1043	25	0	3	1	3	4	18.4425	1	0	3	1	0	3	3	1	2	3	2	3	3	3	1	2	3	2	2	1
1044	21	1	3	1	3	4	23.6652	2	0	3	1	2	1	3	0	0	1	3	2	2	2	1	0	2	1	1	1
1045	22	1	3	1	3		18.0697	1	0	3	1	1	1	1	0	1	0	0	1	3	1	1	1	0	0	0	0
1046	20	1	3	1	3		16.5147	1	0	4	1	1	1	3	0	0	0	3	3	3	3	3	3	2	1	1	0
1047	21	0	3	1	3	4	27.31	3	1	3	1	1	1	1	1	1	3	2	1	3	3	2	2	3	2	1	1
1048	20	0	3	1	3	4	32.6531	4	1	3	1	1	0	0	0	0	1	0	0	3	3	3	1	0	1	2	1
1049	20	1	3	1	3	4	21.0772	2	0	3	1	0	0	0	0	0	0	0	3	3	3	3	1	1	2	1	0
1050	22	0	3	1	4	3	26.2976	3	1	2	0	0	1	0	1	2	2	0	1	1	1	1	1	0	1	1	0
1051	19	1	1	0	2	1	25.8478	3	1	4	1	0	2	0	0	0	1	3	3	3	2	2	3	0	1	1	1
1052	28	1	1	0	3	3	33.6728	4	1	3	1	0	1	1	0	0	2	0	3	3	3	1	1	3	1	1	0
1053	21	1	1	0	3	3	17.8465	1	0	2	0	2	1	2	0	0	1	0	0	3	3	2	2	3	3	2	1
1054	20	0	1	0	2	3	23.8754	2	0	3	1	2	0	0	0	0	3	2	3	3	1	1	3	1	2	0	1
1055	21	1	1	0	3	3	26.2917	3	1	4	1	1	2	3	0	3	0	0	3	0	3	3	3	3	0	2	0
1056	21	1	1	0	3	3	25.3444	3	1	2	0	1	0	2	0	1	3	0	0	3	3	3	1	2	1	1	1
1057	20	1	1	0	3	3	21.6441	2	0	3	1	1	1	1	0	0	1	0	3	3	3	1	0	1	2	2	0
1058	24	1	1	0	3	3	32.8444	4	1	3	1	0	2	1	0	1	1	2	2	2	3	2	2	1	0	1	1
1059	27	1	1	0	3	3	23.3136	2	0	3	1	0	0	0	0	0	0	0	3	3	3	2	3	0	2	0	1
1060	21	1	1	0	3	3	20.2848	2	0	3	1	0	0	0	0	0	0	0	0	3	2	2	0	1	0	0	0
1061	26	1	1	0	3	2	26.079	3	1	3	1	1	1	0	0	1	3	0	0	3	3	2	2	2	2	0	1
1062	22	0	1	0	3	2				4	1	1	1	1	1	1	1	1	1	1	1	1	1	1	1	1	0
1063	20	1	1	0	3	2	26.1427	3	1	3	1	0	0	1	0	0	2	0	1	3	3	2	1	3	2	0	1
1064	24	1	1	0	3	2	20.5049	2	0	3	1	2	2	2	2	3	3	3	3	3	3	3	3	3	3	2	0
1065	20	1	1	0	3	2	19.3337	2	0	2	0	2	1	2	3	3	3	1	2	3	3	1	1	2	0	3	0
1066	21	1	1	0	3		18.0427	1	0	2	0	1	2	3	0	1	3	3	3	3	2	2	1	2	2	2	0
1068	20	1	1	0	3	2	18.9745	2	0	3	1	1	0	3	3	3	1	1	1	3	2	3	3	1	1	0	1
1069	22	1	1	0	3	2	21.9363	2	0	3	1	1	2	1	1	1	0	0	3	3	3	3	3	3	2	2	1
1070	21	1	1	0	3	2	24.4444	2	0	2	0	0	0	0	0	0	2	0	1	2	2	1	1	0	2	1	0
1071	20	1	1	0	3	2	18.902	2	0	3	1	1	1	2	3	3	1	0	3	3	2	2	2	3	1	2	1
1072	21	1	1	0	3	2	22.8928	2	0	3	1	1	3	3	0	3	2	0	0	3	3	3	3	3	3	3	1
1073	20	1	1	0	3	2	20.3244	2	0			1	0	1	3	3	1	1	0	1	2	2	2	1	2	1	1
1074	25	1	1	0	3	3	25.6055	3	1	2	0	0	2	3	0	0	0	3	3	3	2	1	1	3	3	3	0
1075	26	1	1	0	3		18.6667	2	0	2	0	0	0	3	0	1	1	0	0	3	2	1	0	0	2	3	1
1076	26	1	1	0	3	2	30.7599	4	1	3	1	2	1	1	1	2	0	3	1	1	3	1	2	3	1	2	1
1077	21	1	1	0	3	2	29.0657	3	1	3	1	2	1	2	2	2	2	2	3	2	3	1	1	2	0	1	0
1078	20	1	1	0	3	2	29.7442	3	1	3	1	2	2	3	1	2	3	3	3	3	2	2	2	2	1	2	0
1079	21	1	1	0	3	2	27.0993	3	1	4	1	1	2	3	3	3	0	0	0	2	3	1	1	3	1	3	0
1080	24	1	1	0	3	2	27.4348	3	1	3	1	0	1	0	0	1	1	0	0	3	2	1	1	2	1	1	1
1081	21	1	1	0	3	2	27.1314	3	1	3	1	1	0	0	1	1	3	0	1	3	3	1	2	2	3	2	0
1085	21	1	1	0	3	2	24.0588	2	0			3	2	1	3	3	1	1	3	3	3	1	1	1	2	1	0
1086	22	1	1	0	3	2	17.9982	1	0	2	0	0	2	1	0	1	3	0	0	3	1	0	1	3	3	3	1
1087	22	1	1	0	2	3				4	1	1	1	0	0	0	1	0	2	3	2	1	1	2	1	2	0
1088	22	1	1	0	1	3	22.0386	2	0	3	1	1	0	0	0	1	0	1	2	2	2	0	0	0	0	1	1
1090	20	1	3	1	4	4	19.91	2	0	4	1	1	3	2	0	3	1	3	3	1	3	2	1	1	0	1	1
1091	22	1	3	1	4		18.6851	2	0	4	1	2	2	1	1	2	2	3	3	2	1	2	3	1	2	1	0
1092	23	1	3	1	4	4	24.6094	2	0	4	1	0	0	0	0	1	1	1	3	2	2	3	2	3	2	2	1
1093	23	1	3	1	4	4	23.634	2	0	3	1	2	2	2	0	0	0	1	1	3	2	2	2	0	1	0	1
1094	21	1	3	1	4	4	21.3333	2	0	3	1	2	1	3	0	3	0	2	3	3	3	1	0	3	2	1	1
1095	27	0	1	0	1	3	56.5323	4	1	3	1	1	1	1	3	3	3	1	0	2	2	2	2	3	2	2	1
1096	19	1	1	0	1	3	18.6667	2	0	3	1	1	2	1	0	1	2	2	0	3	1	0	2	3	3	3	1
1097	18	1	1	0	1	3	27.7551	3	1	4	1	2	2	3	1	1	1	3	3	3	3	3	3	2	2	3	0
1098	18	1	1	0	1	3	16.955	1	0	3	1	0	0	3	0	0	0	0	3	1	1	2	1	2	1	0	0
1099	18	1	1	0	1	3	24.3902	2	0	3	1	0	1	1	3	3	2	0	0	1	3	1	1	1	0	1	0
1100	21	1	1	0	3	3	22.9481	2	0	3	1	0	0	0	0	0	0	0	0	2	2	1	1	1	0	1	0
1101	23	1	1	0	3	3	24.977	2	0	3	1	0	0	0	0	0	0	2	3	3	3	3	3	0	0	3	0
1102	20	1	1	0	3	3	26.6436	3	1	2	0	1	2	0	0	1	1	0	0	3	3	0	2	3	3	1	1
1103	20	1	1	0	3	3	20.5457	2	0	3	1	1	0	1	0	0	2	0	3	3	3	3	2	1	1	2	1
1104	21	1	1	0	2	3	27.6888	3	1	3	1	0	0	1	0	0	1	2	3	3	2	1	1	1	0	1	0
1105	24	1	1	0	3	3	19.7232	2	0	3	1	0	0	1	0	0	0	2	3	3	3	2	3	3	2	1	1
1106	21	1	1	0	3	3	19.7232	2	0	3	1	1	2	2	2	3	2	3	2	3	1	1	1	0	0	0	1
1107	28	1	1	0	3		30.6939	4	1	3	1	2	2	2	0	0	0	0	0	3	3	0	0	0	1	1	0
1108	20	1	1	0	3	3	20.9572	2	0	2	0	1	1	1	3	3	0	0	3	2	3	3	1	0	2	0	0
1109	20	1	1	0	3		22.3081	2	0	2	0	0	1	1	0	0	2	0	3	3	1	1	1	1	1	1	0
1110	20	1	1	0	3	3	24.2187	2	0	3	1	1	2	3	2	3	3	3	3	3	3	3	3	3	2	2	1
1111	29	1	1	0	1	3	25.9909	3	1	3	1	1	1	1	2	1	2	3	2	3	3	2	1	2	1	1	1
1112	18	1	1	0	1	3	21.9363	2	0			0	0	0	2	1	3	0	3	3	2	2	1	1	1	0	1
1113	18	1	1	0	1	3	23.6244	2	0	2	0	1	1	1	0	0	0	2	0	3	3	3	2	3	1	3	0
1114	21	1	1	0	2	1	19.5965	2	0	3	1	1	2	0	0	0	2	0	0	2	2	2	3	2	0	1	0
1115	19	1	1	0	2	1	28.125	3	1	3	1	1	1	1	0	1	2	2	1	3	3	2	2	2	2	2	0
1116	20	1	1	0	3	1	16.7969	1	0	3	1	0	0	2	2	3	0	0	3	3	3	2	1	3	1	2	0
1117	20	1	1	0	3	1	21.4533	2	0	2	0	2	2	3	2	1	3	0	3	3	2	2	2	0	0	0	0
1118	21	1	1	0	3	1	23.0469	2	0	4	1	0	1	1	0	1	0	0	3	3	2	2	2	3	0	1	1
1119	21	1	1	0	3	1	21.2183	2	0	3	1	0	0	0	0	0	0	0	3	3	1	2	1	1	0	0	1
1120	22	1	1	0	3	1	19.0311	2	0	2	0	3	3	2	0	3	3	0	3	3	1	1	1	3	3	0	1
1122	20	1	1	0	3	1	20.3223	2	0	3	1	0	0	1	0	0	0	1	3	3	2	2	2	3	2	1	1
1123	21	1	1	0	3	1	26.5731	3	1	3	1	0	1	0	2	2	2	3	0	0	2	1	1	2	1	0	1
1125	20	1	1	0	2	1	26.4463	3	1	2	0	1	1	1	2	2	3	2	2	3	3	3	3	3	2	1	0
1126	20	1	1	0	2	1	19.4734	2	0	1	0	0	0	2	0	0	1	0	2	3	3	0	0	1	2	1	1
1127	20	1	1	0	2	1	32.4557	4	1	3	1	0	0	0	0	0	0	2	3	2	1	0	1	0	0	0	0
1129	24	1	3	1	4	3	19.7239	2	0	3	1	1	3	2	2	2	3	0	2	3	3	1	2	2	2	1	0
1130	22	0	1	0	2	1	22.7434	2	0	2	0	0	1	0	1	1	3	0	0	0	2	2	2	1	1	0	1
1131	19	1	1	0	2		21.7865	2	0	3	1	1	1	2	0	0	3	0	2	3	2	3	1	3	2	1	1
1132	20	1	1	0	2	1				4	1	1	1	1	1	1	1	1	1	1	1	1	1	1	1	1	1
1133	20	0	1	0	2	1	25.1953	3	1	3	1	1	1	1	0	2	0	0	3	3	2	2	1	3	2	1	1
1134	26	1	1	0	2	1	17.6471	1	0	4	1	3	3	3	3	3	2	2	3	3	3	1	1	3	3	3	1
1135	19	1	1	0	2	1	22.1893	2	0	3	1	0	0	3	1	3	2	0	1	1	3	3	2	3	3	2	1
1136	20	1	1	0	2	1	25.3444	3	1	3	1	2	2	2	1	3	2	1	3	3	2	3	3	3	1	2	1
1137	23	1	1	0	2	1	19.9573	2	0	3	1	2	2	2	3	3	3	0	3	3	3	3	3	3	3	3	1
1138	19	1	1	0	2	1	20.83	2	0	4	1	0	1	2	0	3	0	0	2	3	2	3	1	3	2	1	0
1139	21	1	1	0	2	1	24.4898	2	0	4	1	1	1	3	0	3	0	3	3	3	3	3	1	3	0	3	1
1140	20	1	1	0	2	1	18.3143	1	0	3	1	1	1	1	0	0	1	0	1	3	3	2	2	1	0	1	1
1141	24	1	1	0	1	3	16.1616	1	0	3	1	2	1	2	1	1	2	2	3	3	2	3	3	3	1	2	0
1142	20	1	1	0	1	3	20.1956	2	0	3	1	1	0	1	2	2	3	1	3	3	1	2	1	2	0	1	1
1143	18	0	1	0	1	3	18.2401	1	0	3	1	0	0	1	1	1	1	0	1	3	1	1	0	2	1	1	0
1144	18	1	1	0	1	3	19.659	2	0	3	1	1	2	1	0	0	2	0	3	3	2	2	1	1	1	1	1
1145	18	1	1	0	1	3	16.6133	1	0	3	1	2	2	2	1	3	1	2	3	3	1	1	1	3	2	2	0
1146	18	1	1	0	1	3	18.3391	1	0	4	1	0	0	0	0	2	1	0	1	2	1	2	1	0	1	0	0
1147	18	1	1	0	1	3	19.5918	2	0	2	0	1	1	1	1	2	1	0	3	3	3	1	1	3	1	2	0
1148	18	1	1	0	1	4	25.1429	3	1	3	1	1	1	0	3	3	3	0	0	3	3	3	3	3	0	2	0
1149	18	1	1	0	1	4	21.6713	2	0	4	1	1	0	2	3	3	1	0	2	3	3	3	2	3	2	1	1
1150	18	1	1	0	1	4	22.231	2	0	3	1	2	1	1	3	3	2	1	0	3	3	2	3	3	2	3	1
1151	19	1	1	0	1	4	24.3865	2	0	3	1	1	0	1	0	0	0	0	3	3	3	1	1	1	1	1	0
1152	18	0	1	0	1	4	20.0851	2	0	2	0	1	1	0	1	1	1	0	1	1	2	1	1	2	2	1	1
1153	25	1	1	0	1	3	20.0288	2	0	3	1	1	1	1	3	3	3	1	1	1	2	3	2	1	1	1	0
1154	18	1	1	0	1	4	32.6531	4	1	3	1	1	1	1	0	0	0	3	3	3	3	3	3	3	2	1	1
1155	23	0	1	0	1	4	26.2346	3	1	3	1	1	2	3	3	3	1	3	1	3	3	3	3	3	3	1	0
1156	24	1	1	0	1	4	24.6548	2	0	3	1	1	2	2	1	3	3	0	0	3	3	3	1	3	3	3	1
1158	18	1	1	0	1	4	16.4062	1	0	2	0	0	0	1	0	0	0	0	0	3	2	1	0	0	0	0	1
1159	19	1	1	0	1	4	20.2395	2	0	3	1	0	1	0	0	2	2	0	1	2	2	1	0	1	1	1	0
1160	18	1	1	0	1	4	36.3322	4	1	3	1	2	0	3	0	0	0	3	3	3	1	0	0	3	2	1	1
1162	20	1	1	0	1	4	19.5312	2	0	3	1	1	0	1	3	3	3	1	2	3	3	3	3	3	1	2	1
1163	19	1	1	0	1	4	17.4747	1	0	3	1	3	3	1	0	2	3	0	0	3	3	3	2	3	2	0	0
1165	18	1	1	0	1	4	24.4444	2	0	4	1	1	1	0	2	2	2	2	3	3	2	2	1	2	3	2	0
1166	18	1	1	0	1	4	20.0474	2	0			1	0	1	0	0	2	1	2	2	3	2	1	0	1	1	1
1167	23	1	1	0	1	4	27.5134	3	1	3	1	1	2	0	0	0	0	3	3	3	3	3	1	0	0	0	1
1168	29	1	1	0	1	4	17.4449	1	0	3	1	2	2	1	0	0	0	1	3	3	2	0	0	1	1	0	1
1169	19	1	1	0	1	4	16.955	1	0	3	1	1	0	3	0	3	2	2	3	3	3	3	1	3	2	2	0
1170	18	1	1	0	1	4	19.8178	2	0	3	1	0	1	1	3	0	2	3	3	2	3	3	3	1	1	2	1
1171	22	1	1	0	4	1	18.3655	1	0	3	1	0	1	3	3	3	3	0	3	3	2	0	0	0	1	2	1
1172	22	1	1	0	2	3	25.8478	3	1	2	0	0	0	2	0	0	0	0	3	3	2	0	0	0	1	1	1
1173	20	1	1	0	2	3	18.6851	2	0	3	1	3	3	3	1	0	0	3	3	3	3	3	3	2	2	2	1
1174	21	1	1	0	4	3	22.5981	2	0	3	1	1	0	1	0	0	0	0	0	0	2	2	2	1	1	1	1
1175	21	1	1	0	2	3	17.2584	1	0	3	1	0	1	0	0	0	1	0	3	3	3	1	1	1	3	1	0
1176	21	1	1	0	2	3	17.301	1	0			0	0	0	0	0	3	0	3	3	1	0	0	3	1	2	0
1177	31	0	1	0	3	3	29.0606	3	1	2	0	1	2	3	3	3	3	2	3	3	2	2	2	2	2	2	0
1178	20	1	1	0	2		25	3	1	3	1	1	0	2	0	0	0	0	3	2	2	1	2	2	3	1	0
1179	24	1	1	0	2	3	16.7969	1	0	2	0	1	2	1	0	0	0	0	1	3	3	3	0	2	1	0	0
1180	19	1	1	0	2	3	30.8463	4	1	3	1	2	2	2	2	3	1	3	3	3	2	2	2	3	0	2	1
1181	28	1	1	0	2	3	24.7409	2	0	3	1	1	2	3	1	3	0	3	2	1	1	1	0	1	0	1	1
1182	20	1	1	0	2	3	27.3437	3	1	3	1	0	1	2	1	1	1	0	2	2	2	2	1	0	1	1	1
1183	20	1	1	0	2		20.5049	2	0	4	1	0	0	0	0	0	1	0	0	2	3	2	2	2	2	0	1
1184	21	0	1	0	2		20.5714	2	0	4	1	2	2	2	1	0	2	2	1	3	3	1	3	1	3	1	1
1185	19	1	1	0	2	3	21.4533	2	0	2	0	1	1	0	3	2	3	0	3	3	2	1	0	0	3	1	0
1186	21	1	1	0	2		26.6667	3	1	3	1	0	0	0	0	0	0	0	0	3	2	1	1	1	1	1	1
1189	18	1	1	0	1	3	28.2284	3	1	3	1	1	0	1	0	2	1	0	1	3	2	2	2	2	1	1	1
1190	20	1	1	0	2	1	28.125	3	1	2	0	0	2	0	0	0	3	1	3	3	1	1	0	2	3	0	0
1191	23	1	1	0	2		21.0962	2	0	2	0	2	1	2	1	2	3	0	0	3	1	2	2	3	1	1	0
1192	22	0	1	0	4		23.7037	2	0	2	0	2	3	2	0	0	3	0	3	3	2	2	3	1	0	0	1
1193	22	1	1	0	2	3	21.83	2	0	2	0	1	0	1	0	0	0	0	1	3	2	1	2	3	3	2	1
1194	20	1	1	0	2	1	24.1415	2	0	3	1	1	1	1	0	0	2	1	2	3	3	2	1	2	1	2	1
1195	19	0	1	0	3		18.4992	1	0	2	0	1	1	1	0	0	2	1	3	3	2	2	2	1	2	0	0
1196	19	1	1	0	2	1	18.7429	2	0	4	1	3	3	3	3	3	1	3	3	3	3	2	2	3	1	1	1
1197	19	1	1	0	2	1				3	1	1	2	1	0	0	2	3	3	3	3	3	3	3	1	1	1
1198	19	1	1	0	1	3	17.9089	1	0	3	1	1	0	3	1	1	2	2	1	3	2	1	1	2	2	2	1
1199	20	1	1	0	1	3	18.026	1	0	4	1	1	1	1	0	1	1	2	2	3	2	2	1	3	2	2	0
1201	21	0	3	1	3	4	22.3094	2	0	3	1	1	0	1	3	1	3	1	0	2	2	2	2	2	3	2	1
1202	22	0	3	1	4	3	21.4692	2	0	2	0	2	0	1	2	2	3	1	3	3	2	2	3	3	3	1	0
1203	20	1	1	0	3	1	28.1065	3	1	3	1	1	2	0	0	1	2	2	3	3	2	3	3	3	2	1	0
1204	20	1	1	0	2		27.1203	3	1	3	1	1	1	1	0	3	1	1	2	2	2	2	0	3	3	3	0
1205	19	1	1	0	2	1	22.8329	2	0	4	1	1	2	0	0	3	2	2	1	3	2	2	2	3	3	1	1
1206	23	0	3	1	3	4	30.6939	4	1	4	1	1	1	2	1	0	2	2	2	3	3	3	3	2	3	2	1
1207	21	0	3	1	3	4	25.6055	3	1	3	1	1	1	1	2	2	1	2	1	3	3	3	3	3	2	1	0
1209	25	1	3	1	5	3	30.0433	4	1	3	1	1	1	3	0	0	0	0	2	3	2	3	1	2	1	2	1
1210	21	1	3	1	5	3	35.1562	4	1	3	1	1	1	0	0	0	0	1	0	2	1	1	0	2	0	2	1
1211	25	1	3	1	5	3	20.9572	2	0	4	1	2	1	2	0	1	2	1	3	3	1	1	1	3	2	1	1
1212	29	1	3	1	5	3	22.5069	2	0	3	1	0	0	0	0	0	1	0	3	3	2	1	2	3	1	1	1
1213	22	1	3	1	4	4	19.7232	2	0	4	1	1	0	1	1	3	1	2	2	2	3	2	1	3	2	2	0
1214	22	0	3	1	4	4	21.6049	2	0	3	1	1	2	2	2	0	3	1	2	3	2	1	2	3	1	2	1
1215	26	1	3	1	5	3	23.1834	2	0	3	1	2	2	0	2	2	1	2	3	3	3	1	2	2	3	2	1
1216	24	1	3	1	5	3	25.3906	3	1	4	1	1	1	2	0	3	0	3	2	3	2	1	2	2	0	1	0
1217	22	1	3	1	4	4	21.6041	2	0	3	1	2	2	3	2	3	0	3	1	3	3	1	0	1	2	1	1
1218	25	1	3	1	5	3	20.7031	2	0	4	1	2	1	2	2	2	0	3	0	3	3	1	2	1	2	2	0
1219	25	1	3	1	4	4	19.047	2	0	2	0	1	0	3	0	0	2	0	0	2	2	3	3	2	1	1	1
1220	22	1	3	1	4	4	20.9985	2	0	3	1	2	2	1	0	0	2	3	3	3	1	3	1	3	0	1	1
1221	24	1	3	1	5	3	33.4124	4	1	3	1	1	0	0	0	2	0	1	3	2	1	0	1	0	0	0	1
1222	23	1	3	1	4	4	22.4082	2	0	4	1	2	2	2	1	2	0	1	1	1	2	2	1	1	1	1	1
1223	22	1	3	1	4	3	18.8707	2	0	3	1	0	1	0	1	1	2	0	3	3	2	2	1	2	1	1	1
1224	22	1	3	1	4	4	17.2635	1	0	4	1	1	1	2	2	2	1	2	3	3	3	3	3	2	2	1	1
1225	21	1	3	1	4		25.0762	3	1	3	1	0	1	0	1	2	1	2	2	3	2	3	2	1	0	0	1
1226	22	1	3	1	4	4	16.6335	1	0	3	1	1	2	2	0	3	0	2	3	2	2	1	1	1	1	1	1
1227	24	1	3	1	4	4	19.9481	2	0			2	1	3	1	3	1	0	1	3	1	1	2	2	1	0	1
1228	22	1	3	1	4	4	21.0772	2	0	4	1	1	2	1	0	3	3	1	2	3	3	2	3	1	1	1	0
1229	22	1	3	1	4	3	22.4323	2	0	2	0	0	1	0	0	0	0	0	3	2	3	1	1	0	1	0	0
1230	22	1	3	1	4	3	27.4348	3	1	4	1	2	1	1	0	2	1	1	2	3	3	3	3	3	2	2	1
1231	22	1	3	1	5	3	22.8374	2	0	4	1	1	0	3	0	0	0	3	3	3	2	1	2	0	1	0	0
1232	22	0	3	1	5	3	22.8374	2	0	2	0	1	1	1	3	3	1	2	3	3	2	2	2	1	2	1	0
1233	23	1	3	1	5	3	22.3478	2	0	2	0	0	0	1	0	0	1	0	3	3	2	1	1	0	0	1	1
1234	26	1	3	1	5	3	22.2656	2	0	3	1	0	1	1	0	0	0	1	0	3	1	1	1	1	1	1	1
1235	21	1	3	1	4	4	31.25	4	1	4	1	1	1	1	0	0	0	1	2	2	1	1	1	0	0	0	0
1236	23	1	3	1	4		24.6548	2	0	3	1	2	3	3	3	3	0	3	1	1	3	3	0	0	2	0	1
1237	23	1	3	1	5	4	26.6728	3	1	3	1	2	1	0	0	1	1	0	1	3	1	1	0	0	0	1	0
1238	23	1	3	1	5	3	21.4533	2	0	3	1	0	0	2	0	0	0	2	1	3	2	0	0	0	2	1	0
1239	24	1	3	1	5	3	23.8751	2	0	3	1	0	1	0	0	0	0	3	3	3	3	3	3	1	2	2	0
1240	23	1	3	1	5	3	20.4491	2	0	4	1	0	0	0	0	0	0	2	3	3	1	1	1	3	1	3	0
1241	22	1	3	1	5	4	28.4005	3	1	4	1	2	2	0	0	0	0	1	0	0	1	1	1	1	2	1	0
1242	22	1	3	1	4	4	33.564	4	1	3	1	1	2	1	0	1	0	2	3	2	2	2	2	2	1	1	1
1243	23	1	3	1	4		21.1927	2	0	4	1	2	3	2	3	3	1	1	3	1	1	2	0	3	2	3	0
1244	22	1	3	1	4	4	25	3	1	3	1	0	1	0	0	3	0	2	3	2	2	2	2	2	2	1	1
1245	22	1	3	1	4	4	19.433	2	0	3	1	0	1	0	0	0	0	0	1	3	1	1	0	2	0	0	0
1246	22	1	3	1	4	4	22.7204	2	0	4	1	1	1	1	0	1	0	0	0	1	2	2	2	1	1	1	0
1247	21	1	3	1	4	4	17.1875	1	0	4	1	0	2	0	0	0	0	2	2	2	2	3	1	3	1	1	1
1248	23	1	3	1	5	3	21.8871	2	0	4	1	2	2	1	1	1	2	3	3	3	3	3	3	3	2	1	1
1249	21	1	3	1	4	4	21.875	2	0	4	1	1	1	2	3	3	3	0	3	2	3	2	1	2	3	2	0
1250	22	1	3	1	5	3	24.9199	2	0	3	1	2	2	1	1	2	1	3	3	3	3	2	1	3	3	1	1
1251	33	1	3	1	4	3	24.2123	2	0	3	1	0	2	1	1	2	0	2	2	2	1	0	0	1	2	0	1
1252	24	1	3	1	5	3	24.7768	2	0	3	1	1	1	0	0	0	0	2	1	3	2	2	2	1	2	1	0
1253	23	1	3	1	5		23.8751	2	0	3	1	1	1	1	1	0	3	3	3	3	3	2	1	3	1	2	1
1254	24	1	3	1	5	3	24.5089	2	0	3	1	0	1	3	2	0	0	3	2	1	3	3	1	1	2	2	0
1255	22	0	1	0	4	3	23.7955	2	0	2	0	1	1	1	1	1	2	0	0	2	2	2	1	2	1	1	0
1256	21	1	3	1	4	3	18.7783	2	0	3	1	1	2	2	3	3	3	3	3	3	3	2	2	2	2	2	0
1258	20	1	1	0	1	3	23.4375	2	0	4	1	3	2	1	0	0	1	0	0	3	3	2	3	3	3	1	1
1259	22	1	1	0	1	3	21.4844	2	0	3	1	0	1	0	0	0	0	0	3	3	3	0	1	1	2	2	0
1260	18	1	1	0	1	3	21.9671	2	0	3	1	0	0	2	0	0	3	0	3	3	2	1	3	3	2	2	1
1262	20	1	1	0	3	3	24.4646	2	0	3	1	1	1	1	0	0	0	2	3	3	3	2	3	0	2	0	0
1264	21	1	1	0	1	3	21.0937	2	0	3	1	2	2	2	1	1	3	3	3	3	3	1	1	1	2	2	0
1265	18	1	1	0	1	3	27.9155	3	1	3	1	1	2	3	3	1	1	3	0	3	3	1	1	2	1	1	1
1297	18	1	1	0	1	3	19.4734	2	0	2	0	1	0	0	0	2	0	0	0	2	2	0	0	0	0	0	1
1391	18	1	3	1	1	3	24.4444	2	0	3	1	3	1	0	1	1	2	0	0	3	2	3	3	3	2	2	1
1393	18	0	3	1	1	3	18.9887	2	0	3	1	2	2	0	1	1	1	0	2	2	3	3	2	3	2	1	1
1394	21	0	3	1	1	3	23.597	2	0	4	1	0	1	0	0	0	0	0	0	3	2	1	0	3	3	1	1
1395	18	0	3	1	1	3	20.6575	2	0	4	1	1	2	1	0	1	1	1	0	3	3	2	2	3	2	1	0
1401	19	1	3	1	1	3	26.5731	3	1	3	1	1	1	0	0	0	0	1	2	3	3	3	3	3	2	2	1
1402	26	1	3	1	1	3	23.3067	2	0	3	1	1	1	0	0	0	0	1	3	3	3	0	0	3	3	3	0
1403	19	1	3	1	1	3	23.1473	2	0	3	1	0	1	1	1	1	2	1	0	1	3	2	3	1	1	2	0
1404	20	1	3	1	1	3	25.711	3	1	4	1	1	1	1	0	0	0	1	1	2	3	2	2	1	1	1	0
1405	19	0	3	1	1	3	21.9138	2	0	2	0	1	2	1	0	1	2	0	3	3	2	1	0	1	2	0	1
1406	18	1	3	1	1	3	24.6094	2	0	3	1	0	1	0	0	0	2	0	1	3	2	2	1	3	1	0	0
1407	18	1	3	1	1	3	26.1224	3	1	2	0	0	3	0	3	0	3	0	3	3	2	0	0	3	0	1	0
1408	19	1	3	1	1	3	19.721	2	0	3	1	1	1	3	2	2	2	2	1	3	3	3	1	3	3	3	1
1410	23	0	3	1	4	3	24.6097	2	0	4	1	0	1	0	3	3	1	1	1	3	3	2	2	3	3	2	0
1411	25	1	3	1	4	4	30.0215	4	1	3	1	1	1	2	3	3	2	3	3	3	3	3	3	2	0	1	1
1421	21	1	3	1	3	3	24.2215	2	0	3	1	1	0	2	0	0	0	0	2	0	2	3	3	1	1	1	1
1422	19	1	3	1	1	4	30.4867	4	1	3	1	1	1	0	0	0	0	2	3	2	1	0	0	2	0	0	0
1423	21	1	3	1	1	4	22.719	2	0			1	1	0	0	0	0	1	1	3	2	1	2	2	1	1	1
1424	20	1	3	1	3		27.3982	3	1	3	1	0	0	0	0	0	0	1	3	3	2	1	1	1	2	1	1
1425	18	1	3	1	1	4	20.5693	2	0	4	1	2	3	1	0	3	2	0	3	3	2	3	2	3	2	3	1
1426	18	0	3	1	1	4	22.3958	2	0	3	1	1	0	0	0	0	0	0	3	2	1	0	0	3	1	2	1
1427	18	0	3	1	1	4	25.6612	3	1	3	1	1	2	1	1	1	2	3	3	3	2	1	2	1	2	2	0
1428	19	1	3	1	1	4	25.711	3	1	4	1	1	2	3	3	0	2	2	0	2	1	1	0	1	2	0	1
1429	19	1	3	1	1	4	21.9076	2	0	3	1	1	2	2	1	1	2	2	1	3	2	2	2	3	1	1	1
1430	19	1	3	1	1	4	29.4029	3	1	4	1	1	1	3	0	0	2	3	3	3	3	2	2	3	1	2	1
1431	18	1	3	1	1	4	18.9866	2	0			1	0	2	0	1	1	0	3	3	3	3	2	1	1	0	1
1432	18	1	3	1	1	4	20.3125	2	0	2	0	0	0	1	0	0	0	0	3	3	1	1	1	2	2	1	1
1433	19	0	3	1	1	4	32.8466	4	1	3	1	0	1	1	0	1	3	1	0	3	1	1	0	3	1	1	0
1434	20	0	3	1	1	4	20.9572	2	0	4	1	1	0	0	0	3	3	1	0	3	3	3	3	0	3	0	1
1435	18	0	3	1	1	4	24.6914	2	0	3	1	0	1	1	0	0	1	1	0	3	2	1	1	2	2	2	1
1436	19	0	3	1	1	4	24.9135	2	0	4	1	2	1	2	2	2	2	1	2	1	3	3	2	2	2	1	1
1437	19	0	3	1	1	4	28.8089	3	1	4	1	1	3	1	3	3	1	3	1	3	3	3	3	3	2	1	0
1438	18	0	3	1	1	4	21.9713	2	0	4	1	2	1	1	3	3	2	1	2	3	2	3	3	3	0	1	1
1440	18	0	3	1	1	3	20.8086	2	0	2	0	1	2	2	0	2	3	2	3	3	2	2	2	2	1	1	0
1441	18	1	3	1	1	3	29.1363	3	1	2	0	2	2	2	2	1	2	1	3	3	1	2	2	2	2	1	0
1442	23	0	3	1	1	4	35.2734	4	1	2	0	0	0	1	0	0	0	0	0	2	3	2	1	1	0	0	0
1443	19	1	3	1	1	4	25.5937	3	1	3	1	1	3	3	2	3	1	3	2	3	1	1	0	3	1	2	0
1444	20	1	3	1	1	4	18.3594	1	0	2	0	0	1	0	0	0	3	2	3	2	2	1	2	0	0	0	1
1445	22	1	3	1	3	4	21.9671	2	0			0	2	1	1	1	1	3	3	3	0	0	0	0	2	0	0
1446	18	0	3	1	1	4	32.8241	4	1	3	1	1	2	2	0	0	3	2	3	3	2	2	1	3	2	3	1
1447	19	1	3	1	1	4	28.9341	3	1	3	1	1	2	1	2	3	3	3	3	3	2	1	1	3	1	1	1
1448	18	1	3	1	1	4	22.9854	2	0	4	1	1	1	1	1	2	2	0	1	3	3	3	1	3	1	1	0
1450	21	1	3	1	1	4	23.1834	2	0			1	0	1	0	0	1	0	3	3	3	3	3	1	2	0	1
1451	20	1	3	1	1	4	20.0796	2	0	4	1	1	0	2	1	2	1	0	1	2	3	3	1	3	2	1	1
1452	18	0	3	1	1	4	17.9282	1	0	3	1	1	0	1	2	3	3	1	3	3	1	1	1	3	2	2	1
1453	18	1	3	1	1	4	22.4712	2	0			3	2	3	0	0	3	3	1	3	3	3	2	2	2	1	0
1454	19	1	3	1	1	4	22.6811	2	0	4	1	0	0	1	0	0	1	0	3	3	2	1	0	3	3	1	1
1455	20	1	3	1	1	4	20.9573	2	0	3	1	1	1	1	0	0	1	2	3	3	2	1	1	3	1	1	0
1504	21	1	3	1	1	4	22.151	2	0	4	1	0	0	1	0	1	0	2	1	3	3	2	3	3	2	1	0
1505	18	1	3	1	1	4	22.4059	2	0	3	1	2	2	3	3	3	3	2	3	2	2	3	3	3	1	2	1
1506	20	1	3	1	1	4	18.75	2	0	3	1	1	0	2	0	2	2	2	3	3	2	2	1	3	0	1	1
1507	18	1	3	1	1	4	22.0581	2	0	2	0	1	1	2	1	0	2	2	3	3	2	1	2	3	1	1	1
1508	18	1	3	1	1	4	22.6757	2	0	3	1	2	2	2	2	1	1	0	3	3	3	2	2	2	1	2	0
1509	20	1	3	1	1	4	20.9566	2	0	4	1	0	1	0	1	2	1	1	3	3	3	2	2	3	3	3	0
1510	18	1	3	1	1	4	25.8065	3	1	3	1	1	1	1	0	1	1	2	3	2	2	2	2	2	1	1	0
1511	19	1	3	1	1	4	19.8141	2	0	4	1	1	1	1	0	0	2	2	3	3	3	3	1	1	1	2	0
1512	18	1	3	1	1	4	18.9745	2	0	4	1	0	1	1	0	0	1	1	3	3	2	2	2	3	1	1	0
1513	18	1	3	1	1	4	29.7442	3	1	3	1	0	1	2	0	0	0	0	3	3	3	3	3	1	1	1	1
1514	18	1	3	1	1	4	17.9931	1	0	3	1	0	1	1	0	0	1	0	0	1	2	1	1	2	1	1	1
1515	18	1	3	1	1	4	19.563	2	0	4	1	0	1	0	1	1	3	2	3	3	2	2	2	1	0	0	0
1516	20	0	3	1	1	4	26.5731	3	1	3	1	1	0	0	0	0	0	0	1	3	3	3	1	2	1	2	0
1517	19	1	3	1	1	4	23.3067	2	0	4	1	0	1	2	0	1	1	2	2	2	2	2	1	3	1	1	1
1518	18	0	3	1	1	4	19.9744	2	0	3	1	1	2	1	1	1	1	0	1	3	3	2	1	3	1	1	1
1519	22	0	1	0	1	1	22.7244	2	0	3	1	1	1	1	2	3	2	0	2	2	2	2	1	1	2	1	1
1520	26	0	1	0	1	1	23.1983	2	0	3	1	0	0	0	1	0	2	0	0	3	1	2	0	3	3	2	0
1521	18	1	1	0	1	1	25.7657	3	1	3	1	0	0	2	0	0	2	0	3	3	3	2	1	3	2	2	1
1522	21	0	1	0	3	3	26.3656	3	1	4	1	1	0	3	3	3	3	2	1	2	1	3	1	1	2	2	0
1523	18	1	1	0	1	1	30.2222	4	1	2	0	1	1	0	0	0	0	0	3	3	0	0	0	2	0	1	1
1524	18	1	3	1	1	4	20.0288	2	0	3	1	1	1	1	0	0	0	1	3	3	3	2	1	3	2	1	0
1525	19	0	1	0	1	1	26.5432	3	1	4	1	1	1	3	1	1	3	3	3	3	3	3	3	3	3	3	1
1526	18	0	1	0	1	1	21.7993	2	0	4	1	0	2	1	0	1	2	0	1	2	2	2	2	2	2	3	1
1527	19	1	1	0	1	1				2	0	1	1	0	2	2	2	0	0	1	1	1	0	0	2	1	1
1528	21	0	1	0	2	4	27.3588	3	1	4	1	0	1	1	0	0	0	3	0	3	2	1	0	3	3	1	0
1529	20	1	1	0	1	4	19.5312	2	0	3	1	0	0	1	0	1	3	0	0	1	3	3	2	0	1	1	1
1530	19	1	1	0	1	4	24.0882	2	0	3	1	2	2	1	2	0	2	1	1	0	3	1	0	1	2	0	1
1531	20	0	1	0	2	1	22.7583	2	0	4	1	1	0	2	2	3	3	1	0	1	3	3	2	3	2	2	1
1532	18	0	1	0	1	1	20.7612	2	0	4	1	0	1	0	1	2	1	0	2	1	2	2	2	2	2	1	1
1533	18	0	1	0	1	1	21.1073	2	0	3	1	2	1	0	3	3	3	1	0	3	2	3	1	1	0	1	0
1534	19	0	1	0	1	1	21.9713	2	0	4	1	1	1	2	1	2	2	2	0	2	3	2	3	3	2	3	1
1535	21	0	1	0	2	3	22.4913	2	0	4	1	1	0	1	1	1	1	2	1	3	2	2	1	3	3	3	0
1536	22	0	1	0	3	4	35.1852	4	1	3	1	1	0	2	1	1	1	1	0	2	2	2	1	3	2	0	1
1537	19	0	1	0	1	1	18.9292	2	0	3	1	0	1	0	0	0	3	0	0	3	3	1	1	2	2	2	0
1538	19	0	1	0	1	1	26.5285	3	1	4	1	2	1	3	3	3	3	2	2	1	2	2	2	2	2	2	1
1539	20	1	1	0	1	1	21.2953	2	0	3	1	1	1	2	0	0	2	0	1	3	2	2	1	2	1	1	0
1540	18	0	1	0	1	1	20.5191	2	0	3	1	0	0	3	2	1	0	0	0	0	3	2	1	3	1	1	0
1541	21	1	1	0	2	3	26.0617	3	1	3	1	2	1	1	0	0	1	2	3	3	2	1	2	1	3	1	1
1542	18	1	1	0	1	4	21.7193	2	0	3	1	2	1	0	2	2	3	0	3	3	0	0	1	2	3	2	1
1543	19	1	1	0	1	4	19.6311	2	0	2	0	1	0	1	0	0	1	0	2	3	2	0	0	2	2	2	0
1544	18	0	1	0	1	1	22.8624	2	0	2	0	2	1	0	2	1	3	1	3	3	2	2	1	1	2	2	1
1545	21	1	1	0	1	1	21.3839	2	0	3	1	2	1	2	1	2	3	3	0	3	2	2	2	3	2	2	0
1547	19	0	1	0	1	1	21.9525	2	0	3	1	1	2	3	2	3	1	0	0	2	2	2	2	1	2	1	1
1548	23	0	1	0	3	1	27.4691	3	1	4	1	0	0	1	1	0	3	0	0	2	2	2	1	3	1	1	0
1549	27	0	1	0	4	3	27.6817	3	1	4	1	1	1	3	2	0	3	0	0	3	3	2	2	3	3	2	0
1550	19	0	1	0	1	1	22.7732	2	0	3	1	0	0	2	0	0	1	0	3	3	3	2	2	3	2	0	1
1551	20	0	1	0	3	3	27.0416	3	1	3	1	2	3	3	2	2	2	2	3	3	3	3	3	3	2	2	1
1552	21	0	1	0	1	4	26.7698	3	1	3	1	0	0	0	1	3	2	3	1	3	3	2	1	0	0	1	1
1553	21	0	1	0	1	1	25.1953	3	1	2	0	1	1	1	0	0	1	0	1	2	2	2	3	1	1	1	0
1554	18	0	1	0	1	1	27.7634	3	1	3	1	1	0	1	1	1	1	3	3	3	3	3	1	3	3	1	0
1555	22	0	1	0	1	1	21.2245	2	0	3	1	1	0	0	0	0	1	0	0	1	1	1	1	2	3	1	0
1556	18	0	1	0	1	1	23.5078	2	0	4	1	1	1	2	3	3	0	0	3	3	2	2	0	0	1	2	1
1557	20	0	1	0	1	1	21.7993	2	0	3	1	2	3	2	2	2	1	0	3	3	2	3	1	2	2	2	0
1568	18	1	3	1	1	3	26.2985	3	1	3	1	0	1	3	0	0	2	0	3	3	1	1	1	3	0	3	1
1569	19	0	1	0	1	1	25.6055	3	1	4	1	1	0	1	2	3	3	3	1	3	3	2	2	3	2	3	0
1570	19	1	3	1	1	4	23.5294	2	0	3	1	1	1	0	0	0	2	0	3	3	1	1	0	0	1	0	0
1571	20	1	3	1	1	4	33.9844	4	1	3	1	0	1	2	0	0	2	3	2	3	2	3	1	1	3	0	1
1572	18	1	3	1	1	4	27.4756	3	1	3	1	0	0	2	0	3	1	2	1	2	3	3	3	3	1	2	0
1573	19	1	3	1	1	4	21.4533	2	0	4	1	0	1	2	0	3	1	0	2	3	3	3	2	3	0	1	0
1574	18	1	3	1	1	4	22.5466	2	0	4	1	2	0	1	1	2	1	3	2	3	1	1	1	1	0	1	0
1575	19	0	3	1	1	4	24.4898	2	0	4	1	1	3	2	3	3	1	2	2	3	3	3	2	3	2	2	1
1576	19	1	3	1	1	4	22.4996	2	0	2	0	0	1	0	0	0	3	1	1	2	3	3	0	0	1	0	0
1577	19	1	3	1	1	4	22.68	2	0	1	0	0	0	0	1	0	2	0	0	1	3	2	2	1	3	1	0
1578	20	0	3	1	1	4	24.3375	2	0	3	1	2	1	1	2	2	2	2	1	3	2	2	2	2	2	2	0
1579	20	0	3	1	1	4	21.9774	2	0			1	3	2	3	3	3	1	3	3	3	1	3	3	3	3	1
1580	18	0	3	1	1	4	17.9592	1	0	4	1	0	1	2	2	0	3	1	1	3	3	3	0	3	1	2	0
1581	19	1	3	1	1	4	17.9687	1	0	3	1	1	0	3	0	0	0	0	3	1	3	1	0	2	1	2	1
1582	19	1	3	1	1	4	23.1405	2	0	4	1	0	2	1	1	2	3	1	3	3	2	2	1	1	0	2	0
1583	18	1	3	1	1	4	21.0498	2	0	3	1	1	0	1	0	0	2	0	0	3	2	2	1	1	1	2	1
1584	21	1	3	1	1	4	22.6757	2	0	3	1	0	2	0	2	0	3	0	3	3	3	3	2	2	2	2	1
1585	18	1	3	1	1	4	31.1419	4	1	3	1	0	0	0	0	0	0	1	3	2	3	1	0	2	1	1	1
1586	19	1	3	1	1	4	19.9792	2	0	3	1	1	1	2	0	0	0	2	3	3	2	1	1	2	2	1	1
1587	21	0	3	1	1	4	22.6627	2	0	3	1	1	0	0	0	0	1	0	0	3	3	0	0	0	1	0	1
1588	19	1	3	1	1	4	19.2234	2	0	4	1	1	2	3	1	1	3	3	0	3	2	2	1	0	0	2	1
1589	18	1	3	1	1	4	24.4646	2	0	4	1	0	0	0	0	0	0	0	0	3	1	0	0	0	0	0	1
1590	18	1	1	0	1	1	28.2284	3	1	4	1	1	2	1	0	0	2	0	1	3	3	2	1	2	2	1	0
